# Supplementary material for: Molecular Recognition and Shape Studies of 3- and 4-Substituted Diarylamide Quasiracemates
Source: MDPI journal article supplement (doi:10.3390/cryst11121596), 2021-12-20
Supplement: s1 [file s1]

Supplementary materials for:

## Molecular Recognition and Shape Studies of 3- and 4-Substituted Diarylamide Quasiracemates

Ali K. Brandt<sup>1</sup>, Derek J. Boyle<sup>1</sup>, Jacob P. Butler<sup>1</sup>, Abigail R. Gillingham<sup>1</sup>, Scott E. Penner<sup>1</sup>, Jacqueline M. Spaniol<sup>2</sup>, Alaina K. Stockdill<sup>3</sup>, Morgan M. Vanderwall<sup>1</sup>, Almat Yeraly<sup>3</sup>, Diana R. Schepens<sup>3\*</sup> and Kraig A. Wheeler<sup>1</sup>

<sup>1</sup> Department of Chemistry, Whitworth University, 300 West Hawthorne Road, Spokane, Washington, 99251, USA.

<sup>2</sup> Department of Chemistry, Eastern Illinois University, 600 Lincoln Avenue, Charleston, Illinois, 61920, USA

<sup>3</sup> Department of Mathematics and Computer Science, Whitworth University, 300 West Hawthorne Road, Spokane, Washington, 99251, USA.

\* Correspondence: dschepens@whitworth.edu (drs); kraigwheeler@whitworth.edu (kaw)

### Supplementary Materials

| Table of Contents                                                | Page  |
|------------------------------------------------------------------|-------|
| <b>S1</b> – Experimental Details                                 | 2-7   |
| <b>S2</b> – Hot Stage Thermomicroscopy                           | 7-25  |
| <b>S3</b> – X-ray Crystallography                                | 26-32 |
| <b>S4</b> – Hirshfeld Surface Analysis                           | 33-34 |
| <b>S5</b> – Molecular Volume and Shape Difference Determinations | 35-37 |

## S1. Experimental Details

**General Considerations:** All chemicals and solvents were purchased from Acros Chemicals, the Aldrich Chemical Co., or VWR Scientific and used as received without further purification unless stated otherwise.  $^1\text{H}$  NMR spectral data were recorded with a 400 MHz JEOL 400SS spectrometer using the Delta software (4.3.6.0). Spectral data are referenced using the solvent residual signal as internal standard and chemical shift values are expressed as  $\delta$  values (ppm) and the value of coupling constants ( $J$ ) in Hertz (Hz). The following abbreviations were used for signal multiplicities: s, singlet; d, doublet; dd, doublet of doublets; t, triplet; q, quartet; m, multiplet; and br, broad.

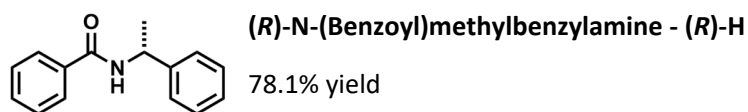

$^1\text{H}$  NMR ( $\text{CDCl}_3$ ):  $\delta$  7.80 - 7.75 (m, 2H,  $\text{H-C}_{\text{Ar}}$ ); 7.53-7.26 (m, 8H,  $\text{H-C}_{\text{Ar}}$ ); 6.32 (br d,  $J = 6.7$  Hz, 1H, N-H); 5.35 (dq,  $J = 6.7$  and 7.1 Hz, 1H,  $\text{C}_{\text{sp}3}\text{-H}$ ); 1.62 (d,  $J = 7.1$  Hz, 3H,  $\text{-CH}_3$ ).

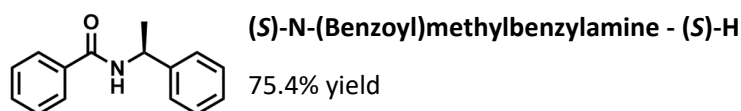

$^1\text{H}$  NMR ( $\text{CDCl}_3$ ):  $\delta$  7.81 - 7.75 (m, 2H,  $\text{H-C}_{\text{Ar}}$ ); 7.52 - 7.26 (m, 8H,  $\text{H-C}_{\text{Ar}}$ ); 6.34 (br d,  $J = 6.8$  Hz, 1H, N-H); 5.35 (dq,  $J = 6.8$  and 7.0 Hz, 1H,  $\text{C}_{\text{sp}3}\text{-H}$ ); 1.62 (d,  $J = 7.0$  Hz, 3H,  $\text{H-CH}_3$ ).

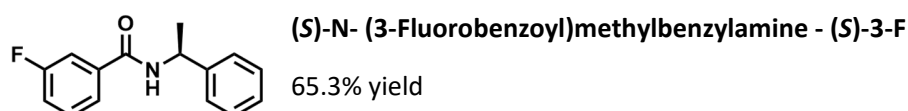

$^1\text{H}$  NMR (400 MHz,  $\text{CDCl}_3$ ):  $\delta$  7.51-7.44 (m, 2H,  $\text{C}_{\text{Ar}}\text{-H}$ ); 7.42-7.24 (m, 6H,  $\text{C}_{\text{Ar}}\text{-H}$ ); 7.22-7.14 (m, 1H,  $\text{C}_{\text{Ar}}\text{-H}$ ); 6.28 (br d,  $J = 6.6$  Hz, 1H, N-H); 5.30 (dq,  $J = 6.6$  and 6.9 Hz, 1H,  $\text{C}_{\text{sp}3}\text{-H}$ ); 1.60 (d,  $J = 6.9$  Hz, 3H,  $\text{CH}_3$ ).

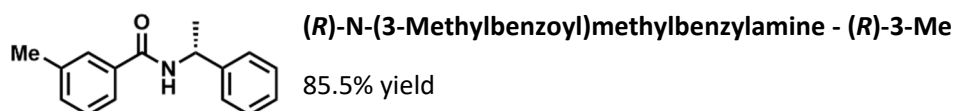

$^1\text{H}$  NMR (400 MHz,  $\text{CDCl}_3$ ):  $\delta$  7.58-7.52 (m, 2H,  $\text{C}_{\text{Ar}}\text{-H}$ ); 7.40-7.31 (m, 4H,  $\text{C}_{\text{Ar}}\text{-H}$ ); 7.29-7.27 (m, 3H,  $\text{C}_{\text{Ar}}\text{-H}$ ); 6.35 (d,  $J = 6.4$  Hz, 1H, N-H); 5.33 (dq,  $J = 6.4$  and 6.8 Hz, 1H,  $\text{C}_{\text{sp}3}\text{-H}$ ); 2.41 (s, 3H,  $\text{CH}_3$ ); 1.59 (d,  $J = 6.8$  Hz, 3H,  $\text{CH}_3$ ).

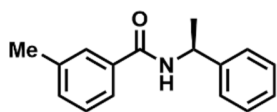

**(S)-N-(2-Methylbenzoyl)methylbenzylamine - (S)-3-Me**

71.8% yield

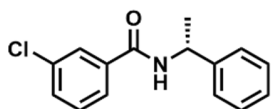

**(R)-N-(3-Chlorobenzoyl)methylbenzylamine - (R)-3-Cl**

48.9% yield

$^1\text{H}$  NMR (400 MHz,  $\text{CDCl}_3$ ):  $\delta$  7.77-7.58 (m, 2H,  $\text{C}_{\text{Ar}}\text{-H}$ ); 7.48-7.25 (m, 7H,  $\text{C}_{\text{Ar}}\text{-H}$ ); 7.52-7.24 (m, 9H,  $\text{C}_{\text{Ar}}\text{-H}$ ), 6.24 (br d,  $J = 6.6$  Hz, 1H, N-H); 5.31 (dq,  $J = 6.6$  and 7.1 Hz, 1H,  $\text{C}_{\text{sp}3}\text{-H}$ ); 1.57 (d,  $J = 7.1$  Hz, 3H,  $\text{CH}_3$ ).

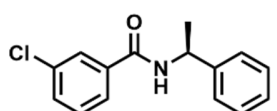

**(S)-N-(3-Chlorobenzoyl)methylbenzylamine - (S)-3-Cl**

61.5% yield

$^1\text{H}$  NMR (400 MHz,  $\text{CDCl}_3$ ):  $\delta$  7.76-7.59 (m, 2H,  $\text{C}_{\text{Ar}}\text{-H}$ ); 7.48-7.24 (m, 7H,  $\text{C}_{\text{Ar}}\text{-H}$ ); 7.53-7.24 (m, 9H,  $\text{C}_{\text{Ar}}\text{-H}$ ); 6.25 (br d,  $J = 6.5$  Hz, 1H, N-H); 5.31 (dq,  $J = 6.5$  and 7.1 Hz, 1H,  $\text{C}_{\text{sp}3}\text{-H}$ ); 1.57 (d,  $J = 7.1$  Hz, 3H,  $\text{CH}_3$ ).

$^1\text{H}$  NMR (400 MHz,  $\text{CDCl}_3$ ):  $\delta$  7.58-7.51 (m, 2H,  $\text{C}_{\text{Ar}}\text{-H}$ ); 7.38-7.25 (m, 4H,  $\text{C}_{\text{Ar}}\text{-H}$ ); 7.30-7.27 (m, 3H,  $\text{C}_{\text{Ar}}\text{-H}$ ); 6.34 (br d,  $J = 6.4$  Hz, 1H, N-H); 5.32 (dq,  $J = 6.4$  and 6.9 Hz, 1H,  $\text{C}_{\text{sp}3}\text{-H}$ ); 2.40 (s, 3H,  $\text{CH}_3$ ); 1.58 (d,  $J = 6.9$  Hz, 3H,  $\text{CH}_3$ ).

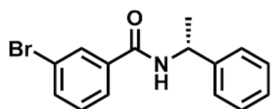

**(R)-N-(3-Bromobenzoyl)methylbenzylamine - (R)-3-Br**

60.5% yield

$^1\text{H}$  NMR (400 MHz,  $\text{CDCl}_3$ ):  $\delta$  7.83-7.60 (m, 2H,  $\text{C}_{\text{Ar}}\text{-H}$ ); 7.39-7.17 (m, 7H,  $\text{C}_{\text{Ar}}\text{-H}$ ); 6.37 (d,  $J = 6.5$  Hz, 1H, N-H); 5.28 (dq,  $J = 6.5$  and 6.8 Hz, 1H,  $\text{C}_{\text{sp}3}\text{-H}$ ); 1.57 (d,  $J = 6.8$  Hz, 3H,  $\text{CH}_3$ ).

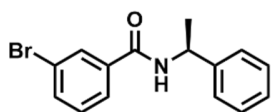

**(S)-N-(3-Bromobenzoyl)methylbenzylamine - (S)-3-Br**

72.0% yield

$^1\text{H}$  NMR (400 MHz,  $\text{CDCl}_3$ ):  $\delta$  7.84-7.60 (m, 2H,  $\text{C}_{\text{Ar}}\text{-H}$ ); 7.39-7.19 (m, 7H,  $\text{C}_{\text{Ar}}\text{-H}$ ); 6.36 (d,  $J = 6.6$  Hz, 1H, N-H); 5.27 (dq,  $J = 6.6$  and 6.8 Hz, 1H,  $\text{C}_{\text{sp}3}\text{-H}$ ); 1.58 (d,  $J = 6.8$  Hz, 3H,  $\text{CH}_3$ ).

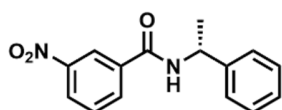

**(R)-N-(3-Nitrobenzoyl)methylbenzylamine - (R)-3-NO<sub>2</sub>**

88.1 % yield

$^1\text{H}$  NMR (400 MHz,  $\text{CDCl}_3$ ):  $\delta$  8.70 (t,  $J = 1.8$  Hz, 1H,  $\text{C}_{\text{Ar}}\text{-H}$ ); 8.38-8.31 (m, 2H,  $\text{C}_{\text{Ar}}\text{-H}$ ); 7.75 (t,  $J = 8.2$  Hz, 1H,  $\text{C}_{\text{Ar}}\text{-H}$ ); 7.46-7.18 (m, 5H,  $\text{C}_{\text{Ar}}\text{-H}$ ); 6.39 (br d,  $J = 6.5$  Hz, 1H, N-H); 5.31 (dq,  $J = 6.5$  and 7.3 Hz, 1H,  $\text{C}_{\text{sp}3}\text{-H}$ ); 1.56 (d,  $J = 7.3$  Hz, 3H,  $\text{CH}_3$ ).

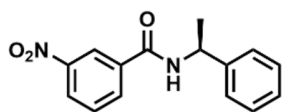

**(S)-N-(3-Nitrobenzoyl)methylbenzylamine - (S)-3-NO<sub>2</sub>**

92.4% yield

<sup>1</sup>H NMR (400 MHz, CDCl<sub>3</sub>): δ 8.71 (t, *J* = 1.7 Hz, 1H, C<sub>Ar</sub>-H); 8.37-8.31 (m, 2H, C<sub>Ar</sub>-H); 7.75 (t, *J* = 8.1 Hz, 1H, C<sub>Ar</sub>-H); 7.45-7.17 (m, 5H, C<sub>Ar</sub>-H); 6.36 (br d, *J* = 6.4 Hz, 1H, N-H); 5.31 (dq, *J* = 6.4 and 7.2 Hz, 1H, C<sub>sp3</sub>-H); 1.56 (d, *J* = 7.2 Hz, 3H, CH<sub>3</sub>).

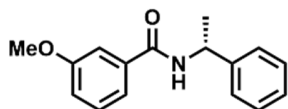

**(R)-N-(3-Methoxybenzoyl)methylbenzylamine - (R)-3-OMe**

52.7% yield

<sup>1</sup>H NMR (CDCl<sub>3</sub>): δ 7.43-7.24 (m, 7H, H-C<sub>Ar</sub>); 6.95-6.88 (m, 2H, H-C<sub>Ar</sub>); 6.29 (br d, *J* = 6.4 Hz, 1H, N-H); 5.33 (dq, *J* = 6.4 and 6.9 Hz, 1H, C<sub>sp3</sub>-H); 3.83 (s, 3H, OCH<sub>3</sub>); 1.62 (d, *J* = 6.9 Hz, 3H, CH<sub>3</sub>).

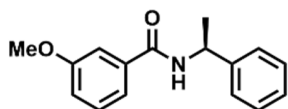

**(S)-N-(3-Methoxybenzoyl)methylbenzylamine - (S)-3-OMe**

43.5% yield

<sup>1</sup>H NMR (CDCl<sub>3</sub>): δ 7.44-7.24 (m, 7H, H-C<sub>Ar</sub>); 6.95-6.87 (m, 2H, H-C<sub>Ar</sub>); 6.29 (br d, *J* = 6.5 Hz, 1H, N-H); 5.33 (dq, *J* = 6.5 and 6.9 Hz, 1H, C<sub>sp3</sub>-H); 3.83 (s, 3H, OCH<sub>3</sub>); 1.62 (d, *J* = 6.9 Hz, 3H, CH<sub>3</sub>).

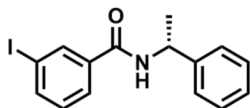

**(R)-N-(3-Iodobenzoyl)methylbenzylamine - (R)-3-I**

68.6% yield

<sup>1</sup>H NMR (400 MHz, CDCl<sub>3</sub>): δ 8.07-7.76 (m, 2H, C<sub>Ar</sub>-H); 7.47-7.11 (m, 7H, C<sub>Ar</sub>-H); 6.51 (br d, *J* = 6.4 Hz, 1H, N-H); 5.28 (dq, *J* = 6.4 and 6.8 Hz, 1H, C<sub>sp3</sub>-H); 1.57 (d, *J* = 6.8 Hz, 3H, CH<sub>3</sub>).

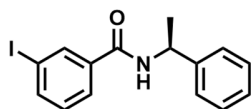

**(S)-N-(3-Iodobenzoyl)methylbenzylamine - (S)-3-I**

50.3% yield

<sup>1</sup>H NMR (400 MHz, CDCl<sub>3</sub>): δ 8.08-7.76 (m, 2H, C<sub>Ar</sub>-H); 7.46-7.10 (m, 7H, C<sub>Ar</sub>-H); 6.51 (br d, *J* = 6.5 Hz, 1H, N-H); 5.28 (dq, *J* = 6.5 and 6.8 Hz, 1H, C<sub>sp3</sub>-H); 1.57 (d, *J* = 6.8 Hz, 3H, CH<sub>3</sub>).

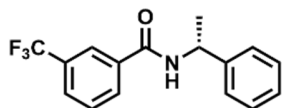

**(R)-N-(3-Trifluorobenzoyl)methylbenzylamine - (R)-3-CF<sub>3</sub>**

74.0% yield

<sup>1</sup>H NMR (400 MHz, CDCl<sub>3</sub>): δ 8.02 (s, 1H, C<sub>Ar</sub>-H); 7.92 (d, *J* = 8.0 Hz, 1H, C<sub>Ar</sub>-H); 7.70 (d, *J* = 7.2 Hz, 1H, C<sub>Ar</sub>-H); 7.48 (t, *J* = 7.6 Hz, 1H, C<sub>Ar</sub>-H); 7.39-7.23 (m, 3H, C<sub>Ar</sub>-H); 6.38 (br d, *J* = 6.6, 1H, N-H); 5.29 (dq, *J* = 6.6 and 6.8 Hz, 1H, C<sub>sp3</sub>-H); 1.57 (d, *J* = 6.8, 3H, CH<sub>3</sub>).



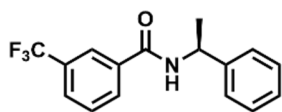

**(S)-N-(3-Trifluorobenzoyl)methylbenzylamine - (S)-3-CF<sub>3</sub>**

65.5% yield

<sup>1</sup>H NMR (400 MHz, CDCl<sub>3</sub>): δ 8.01 (s, 1H, C<sub>Ar</sub>-H); 7.92 (d, *J* = 7.2 Hz, 1H, C<sub>Ar</sub>-H); 7.72 (d, *J* = 7.2 Hz, 1H, C<sub>Ar</sub>-H); 7.51 (d, *J* = 7.8 Hz, 1H, C<sub>Ar</sub>-H); 7.46-7.22 (m, 3H, C<sub>Ar</sub>-H); 6.59 (br d, *J* = 6.5 Hz, 1H, N-H); 5.31 (dq, *J* = 6.5 and 6.8 Hz, 1H, C<sub>sp3</sub>-H); 1.59 (d, *J* = 6.8 Hz, 1H, CH<sub>3</sub>).

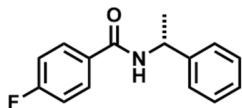

**(R)-N-(4-Fluorobenzoyl)methylbenzylamine - (R)-4-F**

60.0% yield

<sup>1</sup>H NMR (CDCl<sub>3</sub>): δ 7.81 (d, *J* = 8.4 Hz, 2H, H-C<sub>Ar</sub>); 7.45-7.30 (m, 5H, H-C<sub>Ar</sub>); 7.13 (d, *J* = 8.4 Hz, 2H, H-C<sub>Ar</sub>); 6.38 (br d, *J* = 7.1 Hz, 1H, N-H); 5.35 (dq, *J* = 6.8 and 7.1 Hz, 1H, C<sub>sp3</sub>-H); 1.64 (d, *J* = 6.8 Hz, 3H, CH<sub>3</sub>).

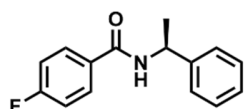

**(S)-N-(4-Fluorobenzoyl)methylbenzylamine - (S)-4-F**

45.3% yield

<sup>1</sup>H NMR (CDCl<sub>3</sub>): δ 7.80 (d, *J* = 8.3 Hz, 2H, H-C<sub>Ar</sub>); 7.43-7.29 (m, 5H, H-C<sub>Ar</sub>); 7.12 (d, *J* = 8.4 Hz, 2H, H-C<sub>Ar</sub>); 6.37 (br d, *J* = 7.0 Hz, 1H, N-H); 5.35 (dq, *J* = 6.8 and 7.0 Hz, 1H, C<sub>sp3</sub>-H); 1.64 (d, *J* = 6.8 Hz, 3H, CH<sub>3</sub>).

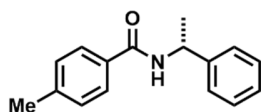

**(R)-N-(4-Methylbenzoyl)methylbenzylamine - (R)-4-Me**

33.0% yield

<sup>1</sup>H NMR (400 MHz, CDCl<sub>3</sub>): δ 7.55 (d, *J* = 8.4 Hz, 2H, C<sub>Ar</sub>-H), 7.43-7.25 (m, 7H, C<sub>Ar</sub>-H); 6.30 (br d, *J* = 6.6 Hz, 1H, N-H); 5.31 (dq, *J* = 6.6 and 7.0 Hz, 1H, C<sub>sp3</sub>-H), 2.40 (s, 3H, CH<sub>3</sub>); 1.27 (d, *J* = 7.0 Hz, 3H, CH<sub>3</sub>).

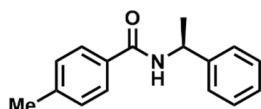

**(S)-N-(4-Methylbenzoyl)methylbenzylamine - (S)-4-Me**

56.9% yield

<sup>1</sup>H NMR (400 MHz, CDCl<sub>3</sub>): δ 7.56 (d, *J* = 8.4 Hz, 2H, C<sub>Ar</sub>-H), 7.44-7.23 (m, 7H, C<sub>Ar</sub>-H); 6.31 (br d, *J* = 6.6 Hz, 1H, N-H); 5.32 (dq, *J* = 6.6 and 6.9 Hz, 1H, C<sub>sp3</sub>-H), 2.40 (s, 3H, CH<sub>3</sub>); 1.27 (d, *J* = 6.9 Hz, 3H, CH<sub>3</sub>).

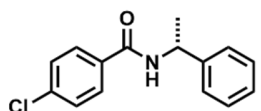

**(R)-N-(4-Chlorobenzoyl)methylbenzylamine - (R)-4-Cl**

77.0% yield

<sup>1</sup>H NMR (CDCl<sub>3</sub>): δ 7.71 (d, *J* = 8.6, 2H, H-C<sub>Ar</sub>); 7.72-7.26 (m, 7H, H-C<sub>Ar</sub>); 6.35 (br d, *J* = 6.5 Hz, 1H, N-H); 5.32 (dq, *J* = 6.5 and 6.8 Hz, 1H, C<sub>sp3</sub>-H); 1.62 (d, *J* = 6.8 Hz, 3H, CH<sub>3</sub>).

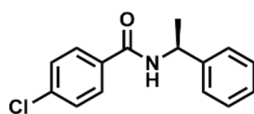

**(S)-N-(4-Chlorobenzoyl)methylbenzylamine - (S)-4-Cl**

67.4% yield

$^1\text{H}$  NMR ( $\text{CDCl}_3$ ):  $\delta$  7.71 (d,  $J$  = 8.6, 2H,  $\text{H-C}_{\text{Ar}}$ ); 7.51-7.37 (m, 7H,  $\text{H-C}_{\text{Ar}}$ ); 6.32 (br d,  $J$  = 6.5 Hz, 1H, N-H); 5.34 (dq,  $J$  = 6.5 and 6.9 Hz, 1H,  $\text{C}_{\text{sp}^3\text{-H}}$ ); 1.62 (d,  $J$  = 6.9 Hz, 3H,  $\text{CH}_3$ ).

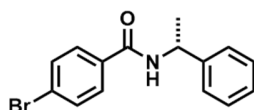

**(R)-N-(4-Bromobenzoyl)methylbenzylamine - (R)-4-Br**

60.7% yield

$^1\text{H}$  NMR ( $\text{CDCl}_3$ ):  $\delta$  7.60 (d,  $J$  = 8.6 Hz, 2H,  $\text{H-C}_{\text{Ar}}$ ); 7.56 (d,  $J$  = 8.6 Hz, 2H,  $\text{H-C}_{\text{Ar}}$ ); 7.38-7.36 (m, 5H,  $\text{H-C}_{\text{Ar}}$ ); 6.34 (br d,  $J$  = 6.4 Hz, 1H, N-H); 5.32 (dq,  $J$  = 6.4 and 7.1 Hz, 1H,  $\text{C}_{\text{sp}^3\text{-H}}$ ); 1.62 (d,  $J$  = 7.1 Hz, 3H,  $\text{CH}_3$ ).

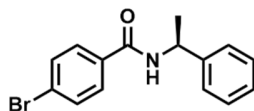

**(S)-N-(4-Bromobenzoyl)methylbenzylamine - (S)-4-Br**

72.4% yield

$^1\text{H}$  NMR ( $\text{CDCl}_3$ ): 7.61 (d,  $J$  = 8.6 Hz, 2H,  $\text{H-C}_{\text{Ar}}$ ); 7.56 (d,  $J$  = 8.6 Hz, 2H,  $\text{H-C}_{\text{Ar}}$ ); 7.38-7.34 (m, 5H,  $\text{H-C}_{\text{Ar}}$ ); 6.33 (br d,  $J$  = 6.3 Hz, 1H, N-H); 5.32 (dq,  $J$  = 6.3 and 7.0 Hz, 1H,  $\text{C}_{\text{sp}^3\text{-H}}$ ); 1.61 (d,  $J$  = 7.0 Hz, 3H,  $\text{CH}_3$ ).

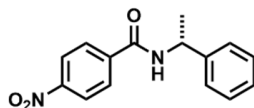

**(R)-N-(4-Nitrobenzoyl)methylbenzylamine - (R)-4-NO<sub>2</sub>**

72.9% yield

$^1\text{H}$  NMR (400 MHz,  $\text{CDCl}_3$ ):  $\delta$  8.56 (d,  $J$  = 8.5 Hz, 2H,  $\text{C}_{\text{Ar}}\text{-H}$ ); 8.02 (d,  $J$  = 8.5 Hz, 2H,  $\text{C}_{\text{Ar}}\text{-H}$ ); 7.45-7.21 (m, 5H,  $\text{C}_{\text{Ar}}\text{-H}$ ); 6.39 (br d,  $J$  = 6.6 Hz, 1H, N-H); 5.35 (dq,  $J$  = 6.6 and 6.8 Hz, 1H,  $\text{C}_{\text{sp}^3\text{-H}}$ ), 1.66 (d,  $J$  = 6.8 Hz, 3H,  $\text{CH}_3$ ).

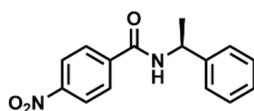

**(S)-N-(4-Nitrobenzoyl)methylbenzylamine - (S)-4-NO<sub>2</sub>**

84.0% yield

$^1\text{H}$  NMR (400 MHz,  $\text{CDCl}_3$ ):  $\delta$  8.54 (d,  $J$  = 8.4 Hz, 2H,  $\text{C}_{\text{Ar}}\text{-H}$ ); 8.02 (d,  $J$  = 8.4 Hz, 2H,  $\text{C}_{\text{Ar}}\text{-H}$ ); 7.45-7.20 (m, 5H,  $\text{C}_{\text{Ar}}\text{-H}$ ); 6.38 (br d,  $J$  = 6.5 Hz, 1H, N-H); 5.35 (dq,  $J$  = 6.5 and 6.8 Hz, 1H,  $\text{C}_{\text{sp}^3\text{-H}}$ ), 1.65 (d,  $J$  = 6.8 Hz, 3H,  $\text{CH}_3$ ).

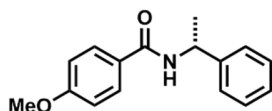

**(R)-N-(4-Methoxybenzoyl)methylbenzylamine - (R)-4-OMe**

50.3% yield

$^1\text{H}$  NMR ( $\text{CDCl}_3$ ):  $\delta$  7.75 (d,  $J$  = 8.4 Hz, 2H, H- $\text{C}_{\text{Ar}}$ ); 7.41-7.28 (m, 5H, H- $\text{C}_{\text{Ar}}$ ); 6.92 (d,  $J$  = 8.4 Hz, 2H, H- $\text{C}_{\text{Ar}}$ ); 6.34 (br d,  $J$  = 6.5 Hz, 1H, N-H); 5.33 (dq,  $J$  = 6.5 and 6.9 Hz, 1H,  $\text{C}_{\text{sp}^3}\text{-H}$ ); 3.84 (s, 3H,  $\text{OCH}_3$ ) 1.62 (d,  $J$  = 6.9 Hz, 3H,  $\text{CH}_3$ ).

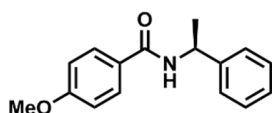

**(S)-N-(4-Methoxybenzoyl)methylbenzylamine - (S)-4-OMe**

38.2% yield

$^1\text{H}$  NMR ( $\text{CDCl}_3$ ):  $\delta$  7.74 (d,  $J$  = 8.7 Hz, 2H, H- $\text{C}_{\text{Ar}}$ ); 7.40 - 7.28 (m, 5H, H- $\text{C}_{\text{Ar}}$ ); 6.92 (d,  $J$  = 8.7 Hz, 2H, H- $\text{C}_{\text{Ar}}$ ); 6.36 (br d,  $J$  = 6.5 Hz, 1H, N-H); 5.33 (dq,  $J$  = 6.5 and 6.9 Hz, 1H,  $\text{C}_{\text{sp}^3}\text{-H}$ ); 3.85 (s, 3H,  $\text{OCH}_3$ ) 1.62 (d,  $J$  = 6.9 Hz, 3H,  $\text{CH}_3$ ).

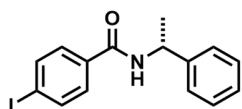

**(R)-N-(4-Iodobenzoyl)methylbenzylamine - (R)-4-I**

62.9% yield

$^1\text{H}$  NMR ( $\text{CDCl}_3$ ):  $\delta$  7.80 (d,  $J$  = 8.3 Hz, 2H, H- $\text{C}_{\text{Ar}}$ ); 7.52 (d,  $J$  = 8.3 Hz, 2H, H- $\text{C}_{\text{Ar}}$ ); 7.41-7.30 (m, 5H, H- $\text{C}_{\text{Ar}}$ ); 6.32 (br d,  $J$  = 6.4 Hz, 1H, N-H); 5.34 (dq,  $J$  = 6.4 and 7.0 Hz, 1H,  $\text{C}_{\text{sp}^3}\text{-H}$ ); 1.65 (d,  $J$  = 7.0 Hz, 3H, H- $\text{CH}_3$ ).

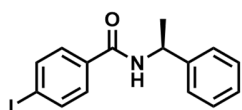

**(S)-N-(4-Iodobenzoyl)methylbenzylamine - (S)-4-I**

55.1% yield

$^1\text{H}$  NMR ( $\text{CDCl}_3$ ):  $\delta$  7.81 (d,  $J$  = 8.4 Hz, 2H, H- $\text{C}_{\text{Ar}}$ ); 7.51 (d,  $J$  = 8.4 Hz, 2H, H- $\text{C}_{\text{Ar}}$ ); 7.44-7.29 (m, 5H, H- $\text{C}_{\text{Ar}}$ ); 6.38 (br d,  $J$  = 6.5 Hz, 1H, N-H); 5.35 (dq,  $J$  = 6.5 and 7.1 Hz, 1H,  $\text{C}_{\text{sp}^3}\text{-H}$ ); 1.64 (d,  $J$  = 7.1 Hz, 3H,  $\text{CH}_3$ ).

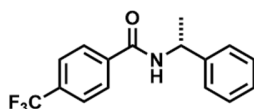

**(R)-N-(4-Trifluoromethylbenzoyl)methylbenzylamine - (R)-4-CF<sub>3</sub>**

87.0% yield

$^1\text{H}$  NMR ( $\text{CDCl}_3$ ):  $\delta$  7.90 (d,  $J$  = 8.3 Hz, 2H, H- $\text{C}_{\text{Ar}}$ ); 7.72 (d,  $J$  = 8.3 Hz, 2H, H- $\text{C}_{\text{Ar}}$ ); 7.44-7.31 (m, 5H, H- $\text{C}_{\text{Ar}}$ ); 6.35 (br d,  $J$  = 6.5 Hz, 1H, N-H); 5.37 (dq,  $J$  = 6.5 and 7.0 Hz, 1H,  $\text{C}_{\text{sp}^3}\text{-H}$ ); 1.66 (d,  $J$  = 7.0 Hz, 3H,  $\text{CH}_3$ ).

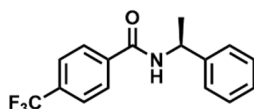

**(S)-N-(4-Trifluoromethylbenzoyl)methylbenzylamine - (S)-4-CF<sub>3</sub>**

74.8% yield

$^1\text{H}$  NMR ( $\text{CDCl}_3$ ):  $\delta$  7.91 (d,  $J$  = 8.4 Hz, 2H, H- $\text{C}_{\text{Ar}}$ ); 7.71 (d,  $J$  = 8.5 Hz, 2H, H- $\text{C}_{\text{Ar}}$ ); 7.45-7.31 (m, 5H, H- $\text{C}_{\text{Ar}}$ ); 6.36 (br d,  $J$  = 6.6 Hz, 1H, N-H); 5.35 (dq,  $J$  = 6.6 and 7.1 Hz, 1H,  $\text{C}_{\text{sp}^3}\text{-H}$ ); 1.65 (d,  $J$  = 7.1 Hz, 3H,  $\text{CH}_3$ ).

## S2. Hot-Stage Microscopy

### *Hot-Stage Images of Racemic and Quasiracemic Pairs – 3-substituted diarylamides*

#### Racemic Mixtures

(*R*)-H (left)

(*S*)-H (right)

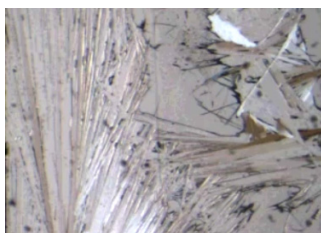

116.0°

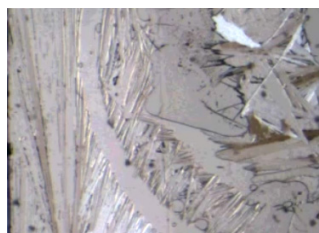

120.9°

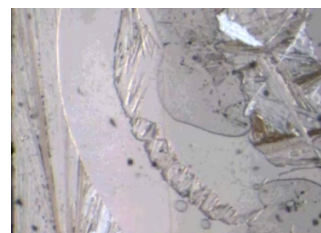

126.1°

(*R*)-3-F

(*S*)-3-F

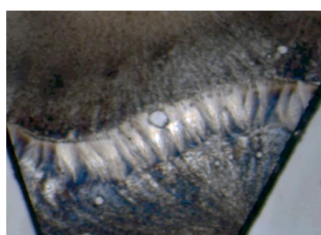

254.2°

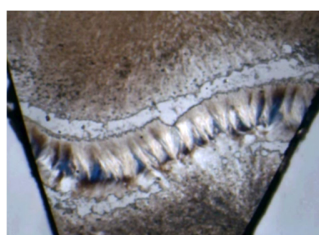

159.1°

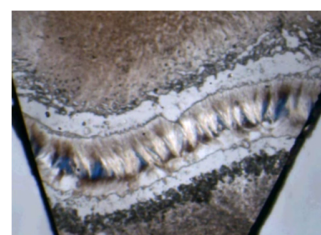

163.3°

(*R*)-3-Me

(*S*)-3-Me

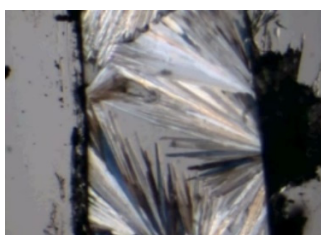

83.9°

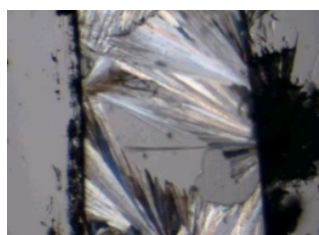

89.3°

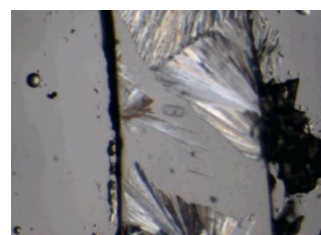

105.3°

(*R*)-3-Cl

(*S*)-3-Cl

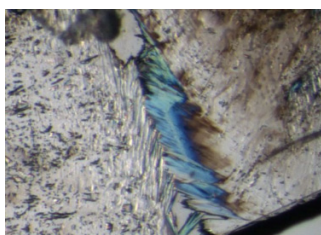

90.0°

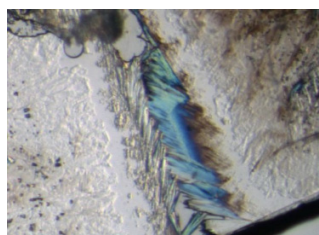

97.6°

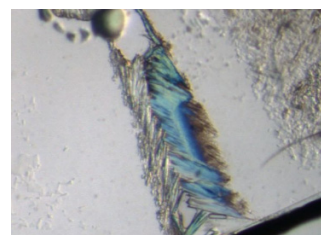

101.7°

(*R*)-3-Br

(*S*)-3-Br

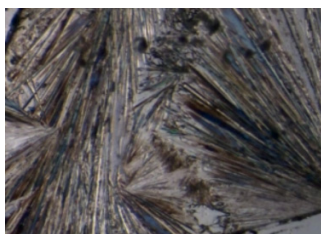

80.5°

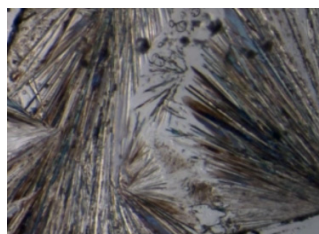

84.3°

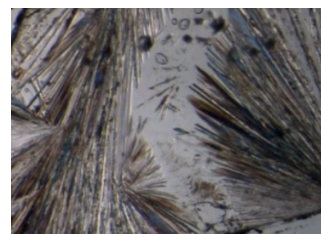

85.5°



(*R*)-3-NO<sub>2</sub>  
(*S*)-3-NO<sub>2</sub>

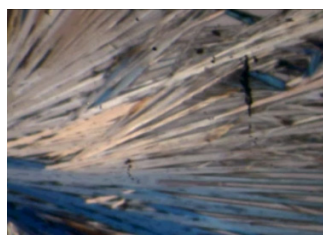

124.4°

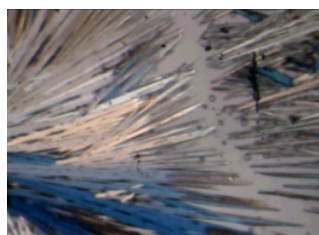

141.2°

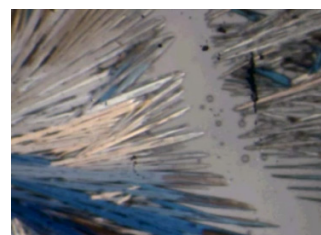

145.0°

(*R*)-3-OMe  
(*S*)-3-OMe

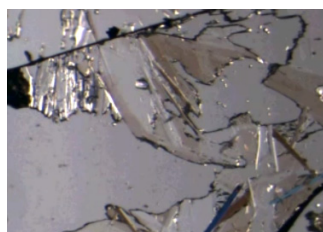

117.0°

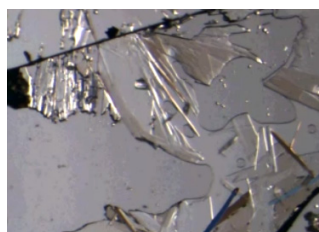

120.4°

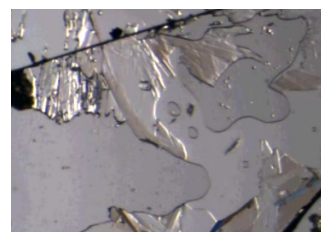

134.2°

(*R*)-3-I  
(*S*)-3-I

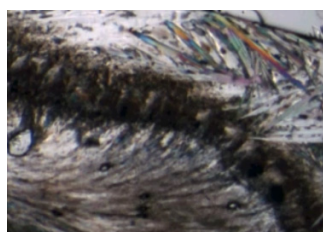

122.5°

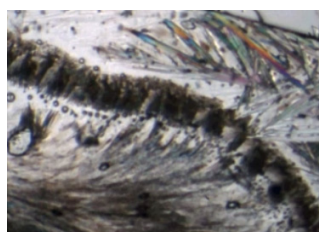

128.6°

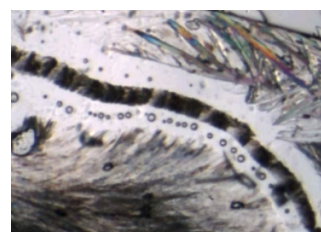

132.4°

(*R*)-3-CF<sub>3</sub>  
(*S*)-3-CF<sub>3</sub>

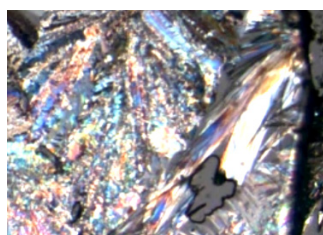

107.2°

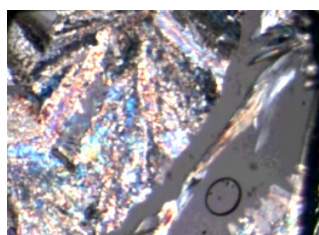

130.1°

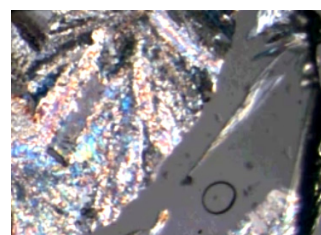

135.2°

### 3-Hydrogen

(*R*)-H  
(left)

(*S*)-3-F  
(right)

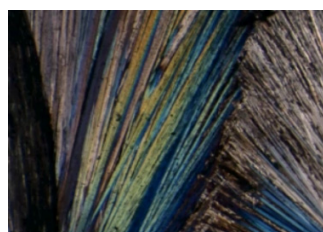

101.1°

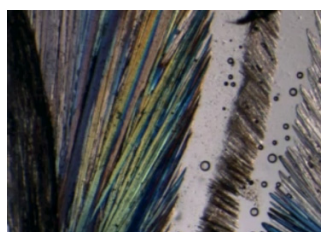

116.1°

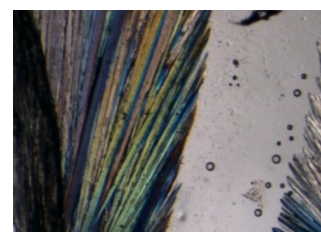

118.4°



This micrograph shows a ductile fracture surface. The surface is characterized by large, rounded dimples, which are the result of the plastic deformation of the material prior to fracture. The dimples are distributed across the fracture surface, indicating a process of void growth and coalescence.

 $105.6^\circ$



(*S*)-H  
(*R*)-3-CF<sub>3</sub>

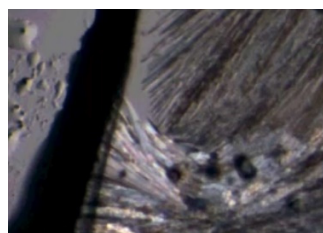

105.3°

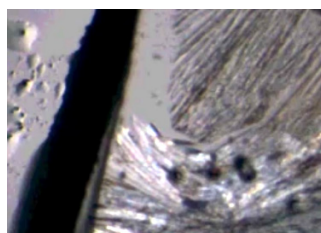

112.1°

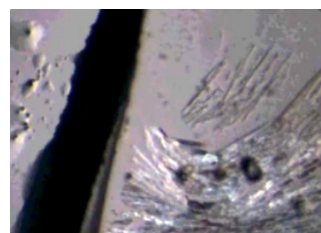

116.6°

**3-Fluoro**

(*R*)-3-Me  
(*S*)-3-F

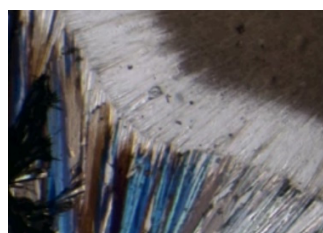

97.0°

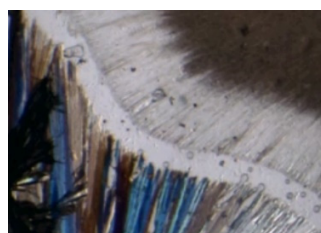

101.3°

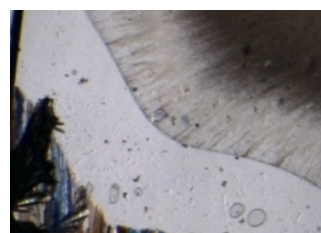

112.0°

(*R*)-3-F  
(*S*)-3-Cl

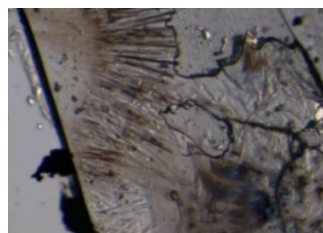

77.3°

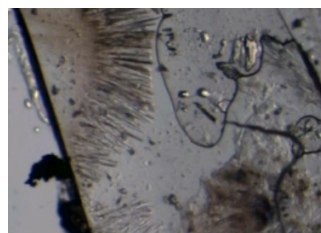

90.4°

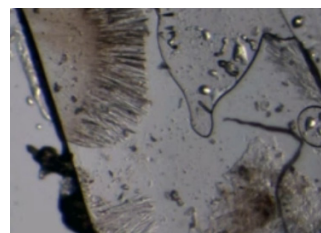

94.5°

(*R*)-3-Br  
(*S*)-3-F

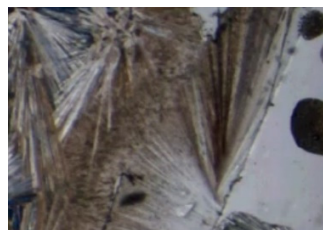

60.7°

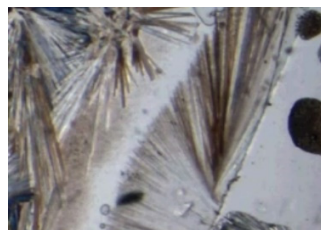

76.5°

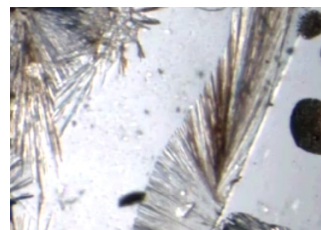

102.3°

(*R*)-3-F  
(*S*)-3-NO<sub>2</sub>

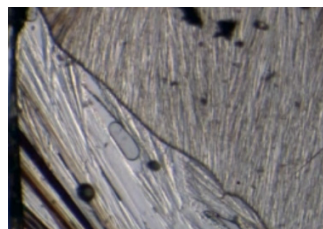

118.8°

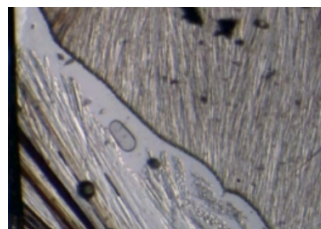

124.7°

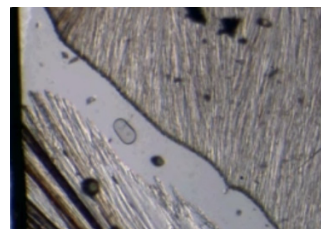

127.9°

(*R*)-3-OMe  
(*S*)-3-F

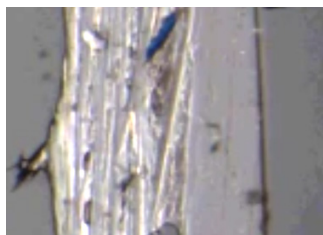

106.4°

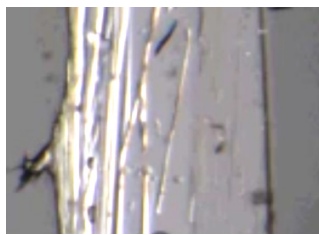

110.0°

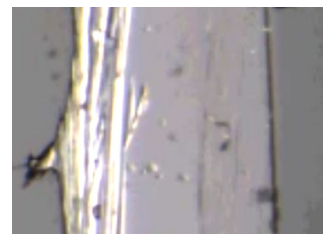

114.5°

(*R*)-3-I  
(*S*)-3-F

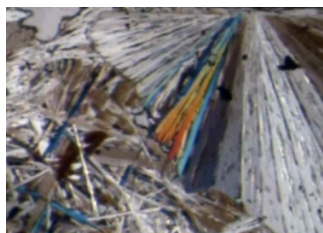

104.8°

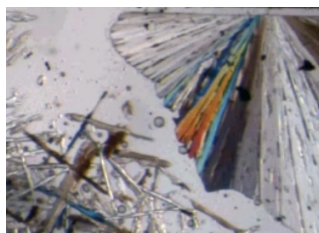

126.7°

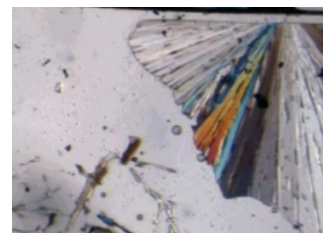

130.2°

(*S*)-3-CF<sub>3</sub>  
(*R*)-3-F

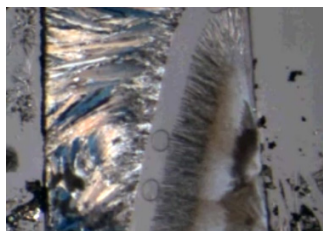

80.3°

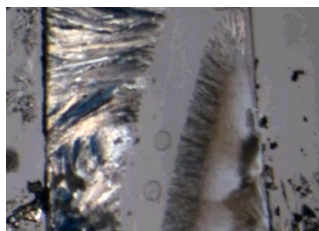

96.7°

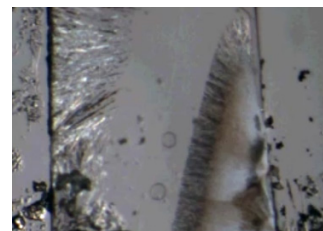

102.0°

### 3-Methyl

(*R*)-3-Me  
(*S*)-3-Cl

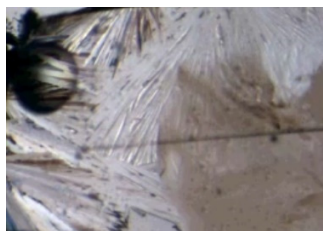

89.3°

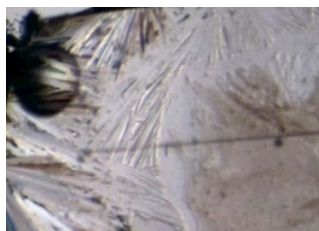

95.1°

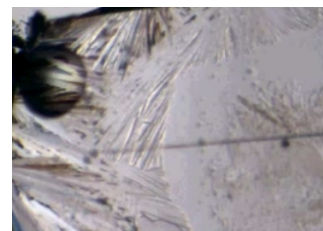

98.3°

(*R*)-3-Br  
(*S*)-3-Me

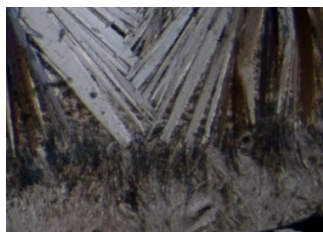

62.8°

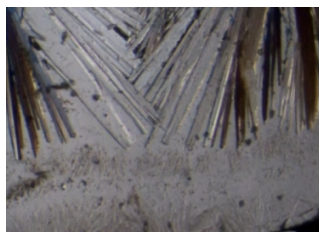

84.5°

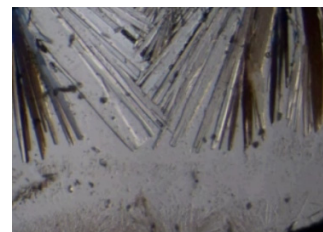

85.0°



(*R*)-3-Me  
(*S*)-3-NO<sub>2</sub>

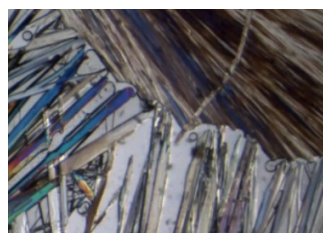

88.6°

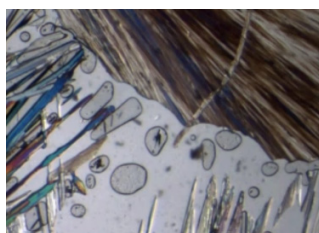

104.6°

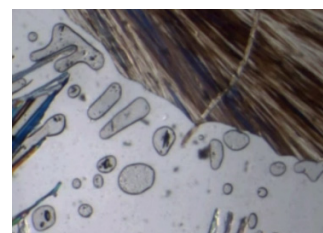

110.2°

(*R*)-3-OMe  
(*S*)-3-Me

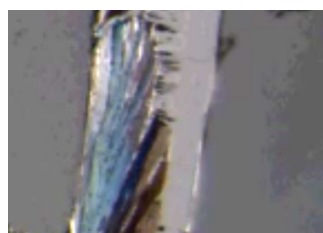

90.2°

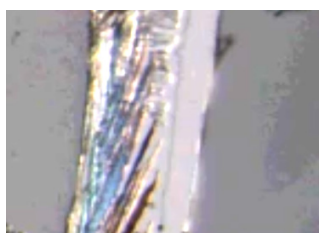

105.3°

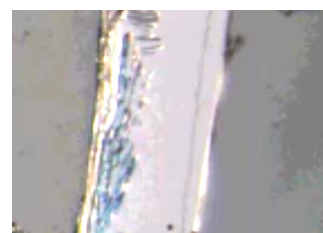

106.8°

(*R*)-3-Me  
(*S*)-3-I

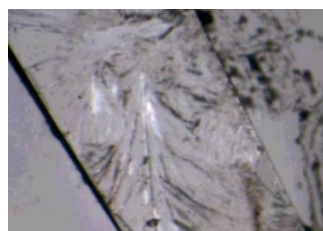

85.4°

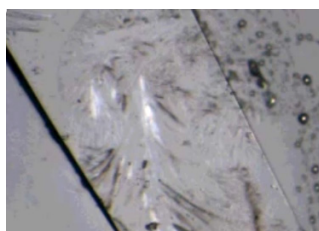

102.2°

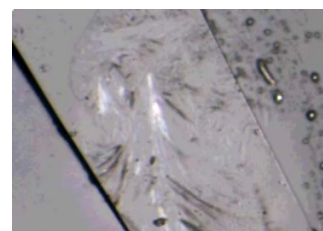

108.1°

(*R*)-3-Me  
(*S*)-3-CF<sub>3</sub>

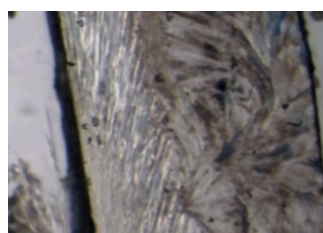

81.7°

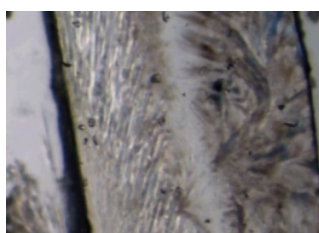

84.4°

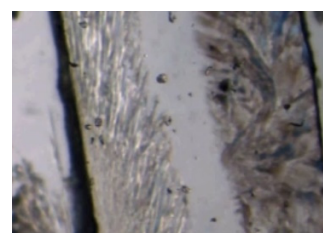

89.1°

### 3-Chloro

(*R*)-3-Cl  
(*S*)-3-Br

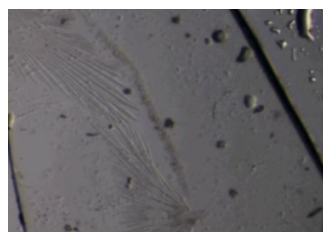

84.1°

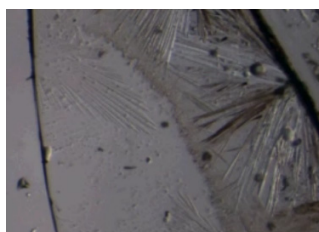

91.2°

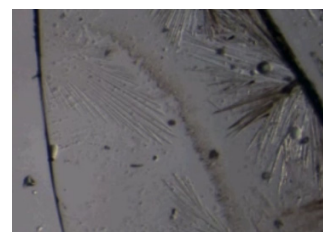

101.8°

(*R*)-3-NO<sub>2</sub>  
(*S*)-3-Cl

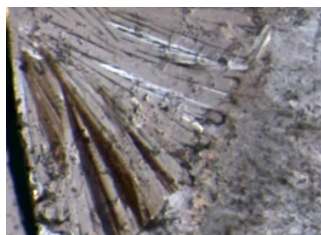

84.9°

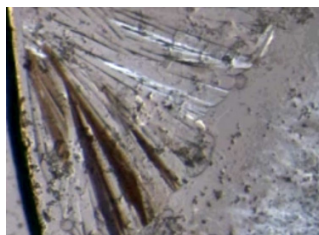

95.7°

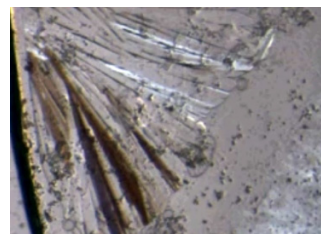

97.4°

(*R*)-3-Cl  
(*S*)-3-OMe

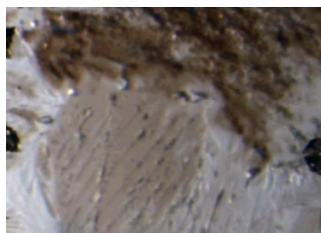

69.2°

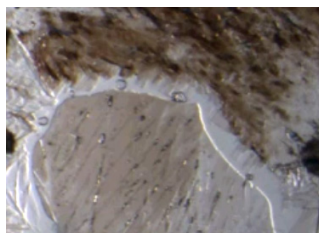

90.5°

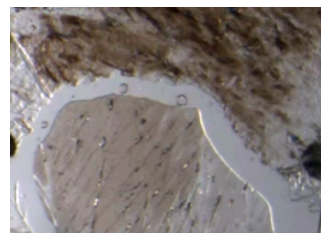

96.0°

(*R*)-3-Cl  
(*S*)-3-I

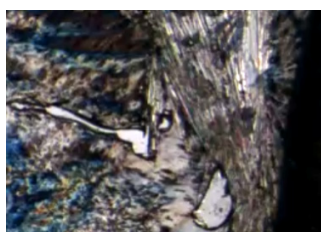

75.2°

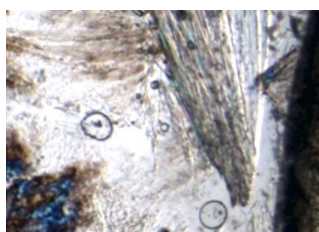

95.4°

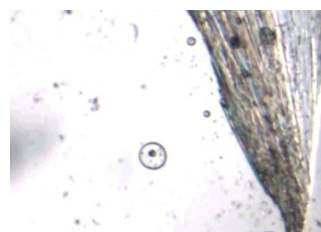

120.3°

(*R*)-3-Cl  
(*S*)-3-CF<sub>3</sub>

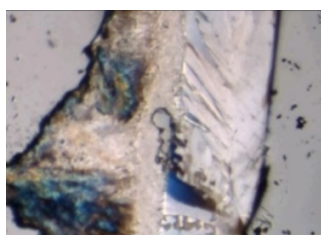

73.6°

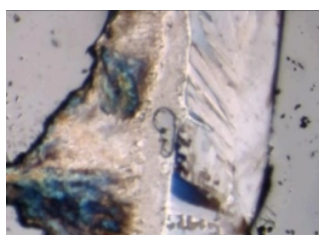

78.2°

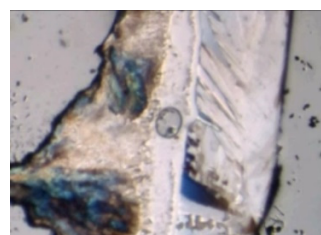

80.5°

### 3-Bromo

(*R*)-3-NO<sub>2</sub>  
(*S*)-3-Br

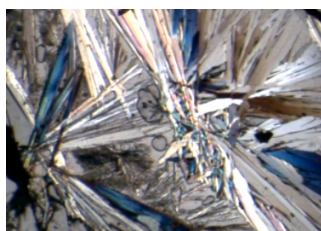

105.0°

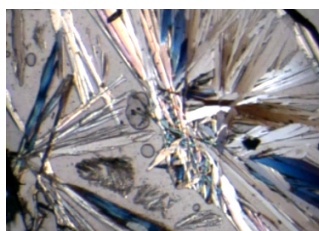

112.2°

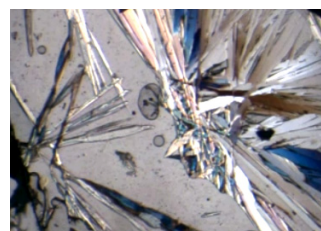

118.1°



(*R*)-3-Br  
(*S*)-3-OMe

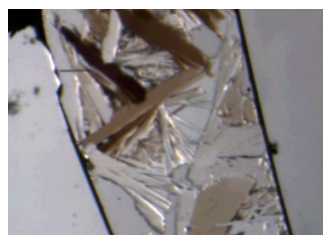

95.3°

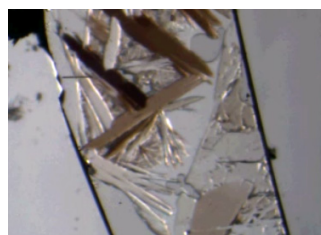

101.4°

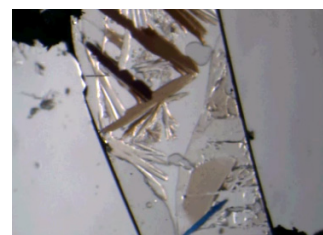

107.1°

(*R*)-3-Br  
(*S*)-3-I

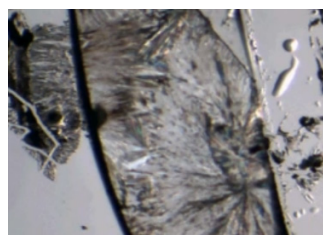

88.5°

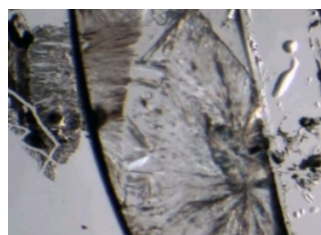

98.7°

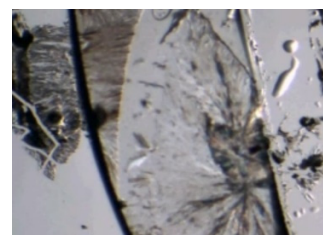

104.3°

(*S*)-3-Br  
(*R*)-3-CF<sub>3</sub>

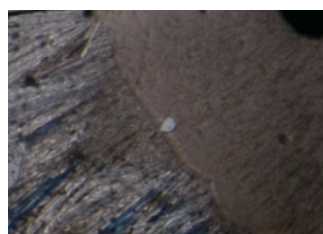

113.5°

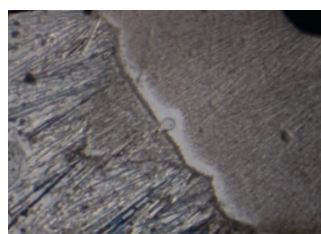

117.2°

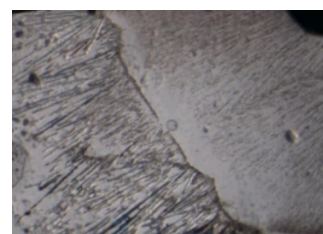

118.1°

### 3-Nitro

(*R*)-3-NO<sub>2</sub>  
(*S*)-3-OMe

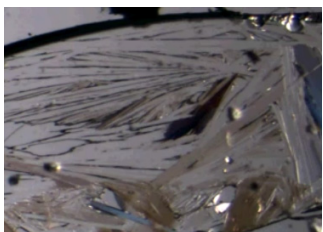

70.5°

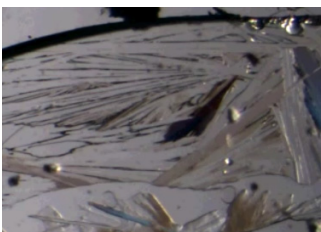

98.0°

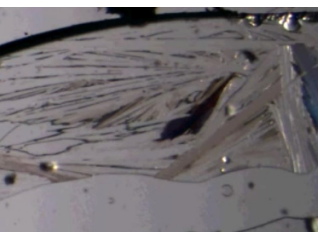

100.3°

(*R*)-3-NO<sub>2</sub>  
(*S*)-3-I

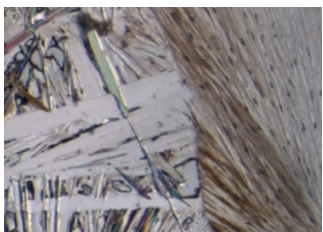

121.1°

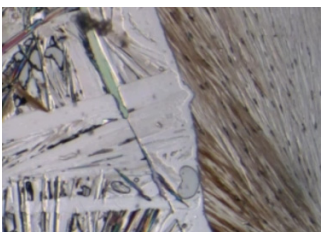

127.8°

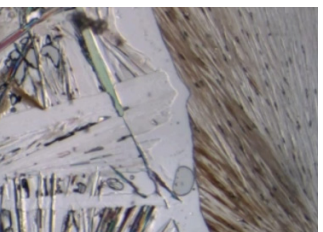

131.3°

(*R*)-3-CF<sub>3</sub>  
(*S*)-3-NO<sub>2</sub>

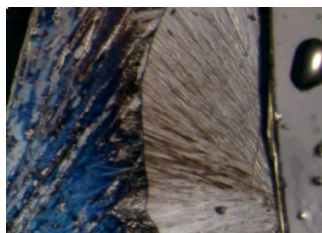

80.6°

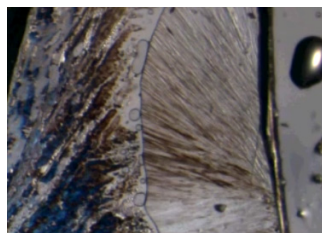

94.8°

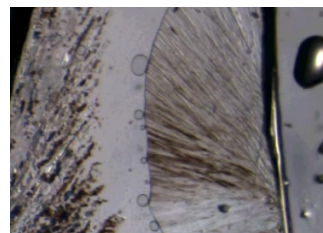

99.6°

### 3-Methoxy

(*R*)-3-I  
(*S*)-3-OMe

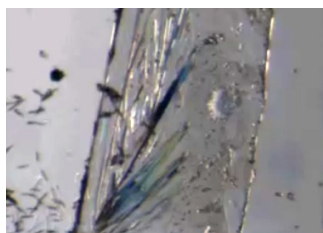

104.8°

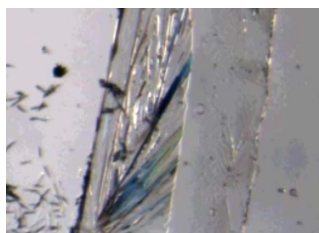

122.9°

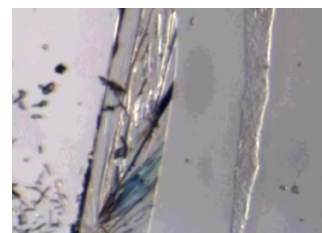

135.0°

(*R*)-3-CF<sub>3</sub>  
(*S*)-3-OMe

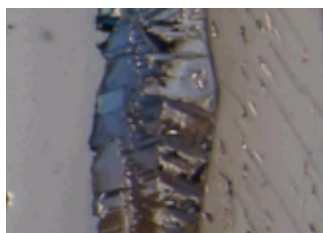

87.1°

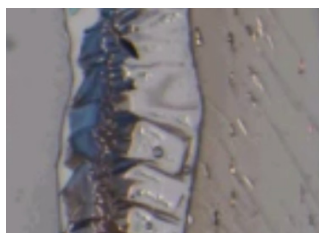

89.4°

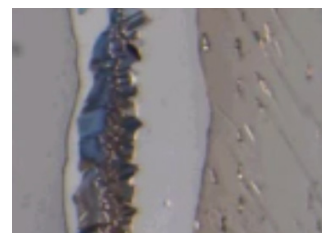

93.5°

### 3-Iodo

(*R*)-3-I  
(*S*)-3-CF<sub>3</sub>

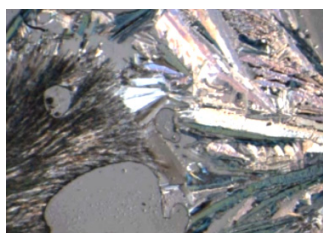

87.2°

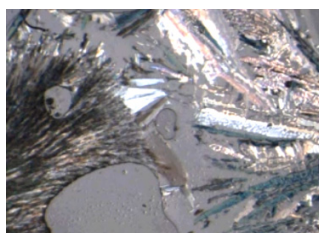

93.8°

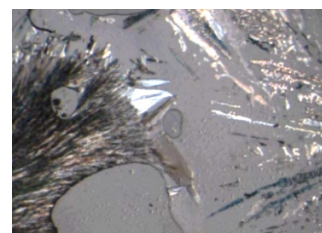

97.6°



**Hot-Stage Images of Racemic and Quasiracemic Pairs – 4-substituted diarylamides**

**Racemic Mixtures**

(S)-H (left)

(R)-H (right)

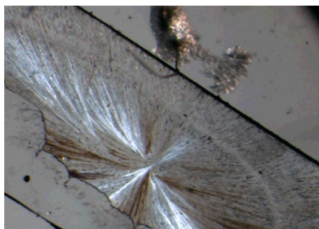

108.5°

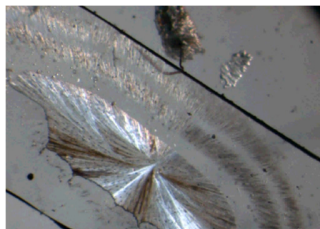

119.8°

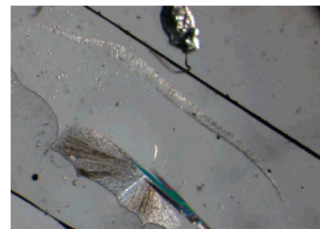

127.8°

(S)-4-F

(R)-4-F

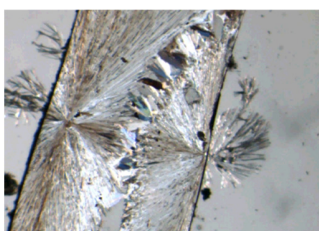

99.9°

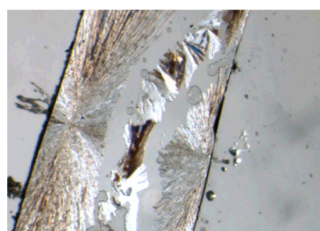

124.8°

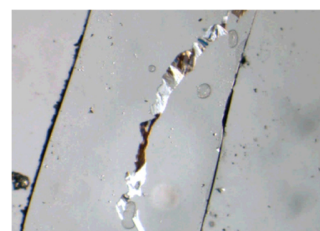

132.5°

(R)-4-Me

(S)-4-Me

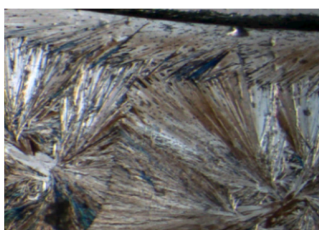

103.3°

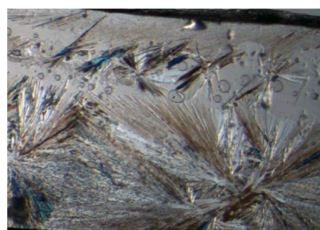

125.8°

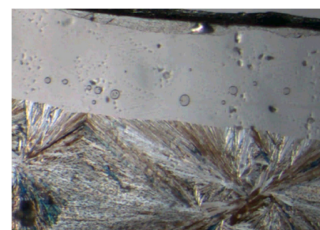

132.0°

(S)-4-Cl

(R)-4-Cl

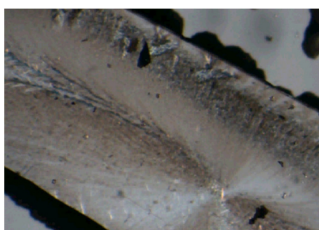

126.2°

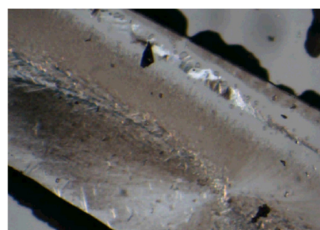

139.2°

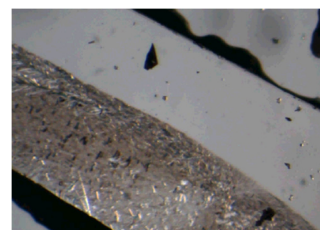

151.3°

(R)-4-Br

(S)-4-Br

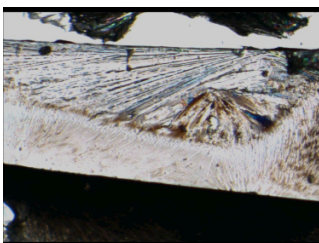

136.3°

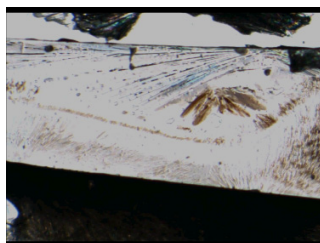

151.1°

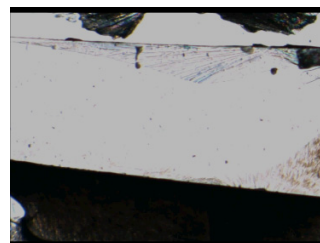

169.1°

(*R*)-4-NO<sub>2</sub>  
(*S*)-4-NO<sub>2</sub>

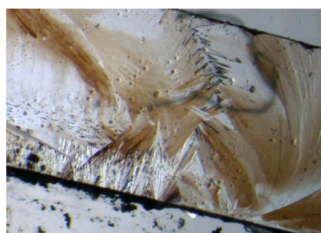

106.9°

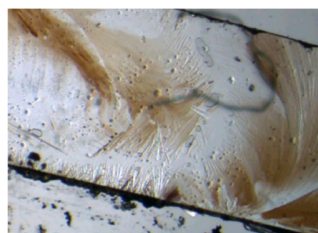

113.1°

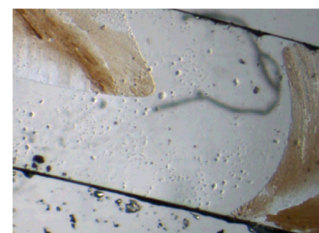

142.0°

(*S*)-4-OMe  
(*R*)-4-OMe

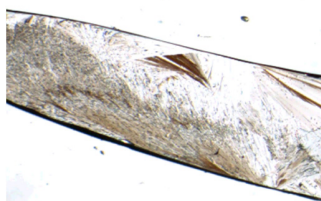

141.6°

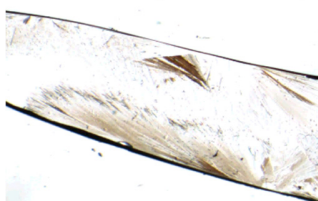

150.7°

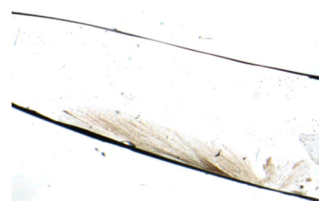

156.3°

(*R*)-4-I  
(*S*)-4-I

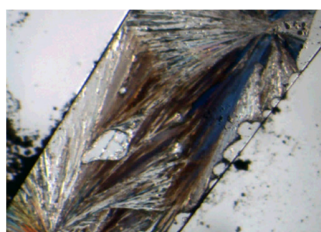

196.6°

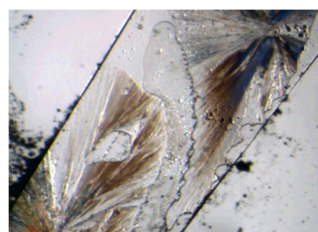

213.7°

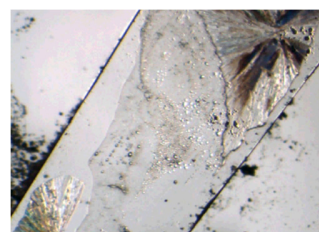

229.7°

(*R*)-4-CF<sub>3</sub>  
(*S*)-4-CF<sub>3</sub>

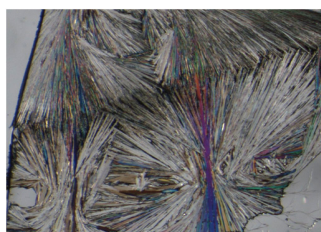

134.8°

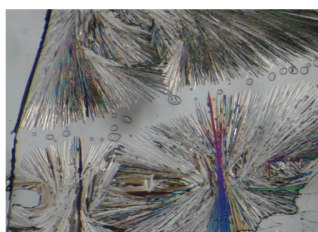

137.3°

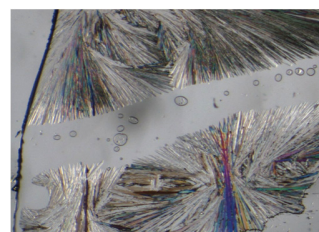

138.8°

#### 4-Hydrogen

(*S*)-H  
(left)

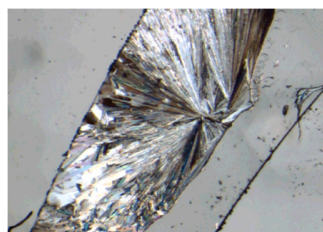

98.3°

(*R*)-4-F  
(right)

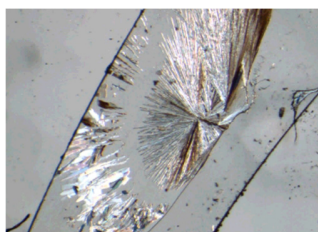

112.8°

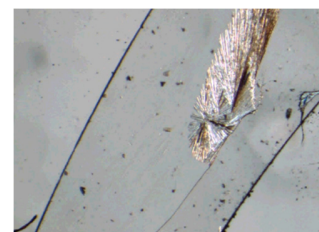

122.3°



(*R*)-H  
(*S*)-4-Me

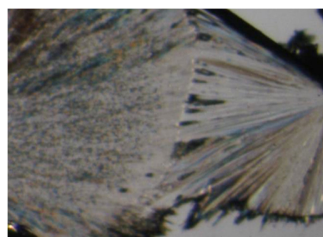

101.1°

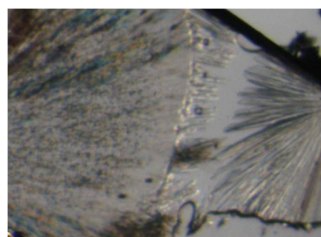

107.2°

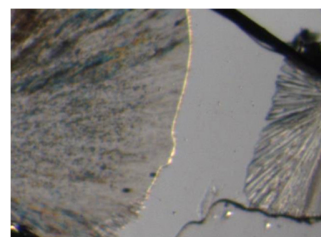

111.8°

(*S*)-4-Cl  
(*R*)-H

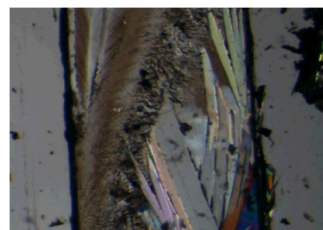

89.6°

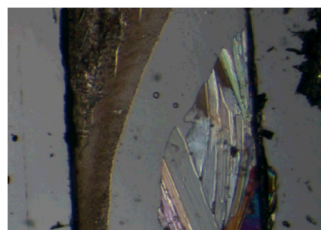

110.3°

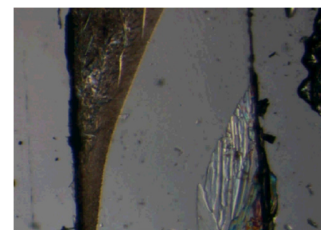

123.8°

(*R*)-H  
(*S*)-4-Br

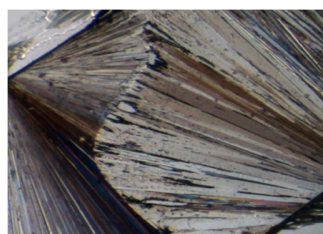

107.7°

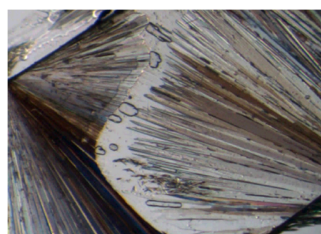

119.5°

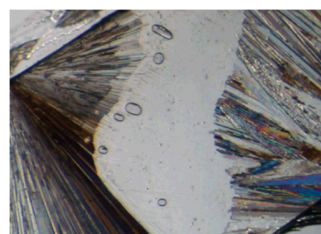

136.3°

(*S*)-H  
(*R*)-4-NO<sub>2</sub>

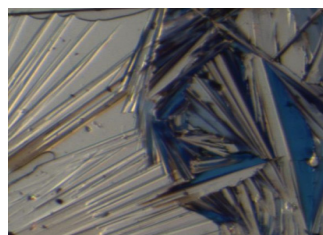

96.3°

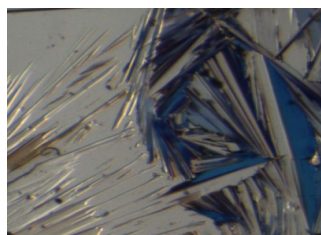

101.4°

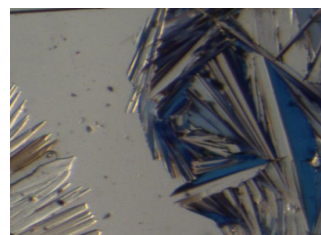

104.2°

(*S*)-H  
(*R*)-4-OMe

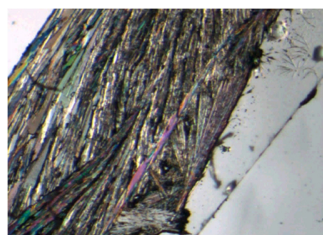

102.5°

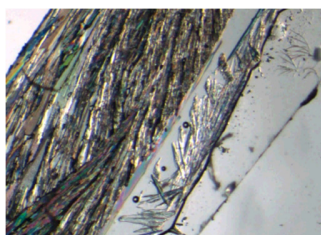

116.9°

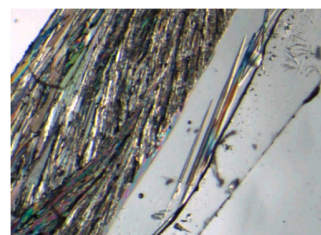

121.1°

(*R*)-H  
(*S*)-4-I

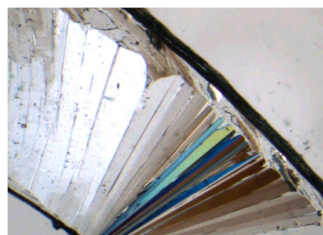

117.7°

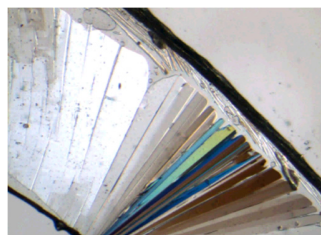

132.2°

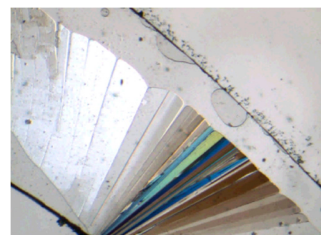

138.3°



(*S*)-H  
(*R*)-4-CF<sub>3</sub>

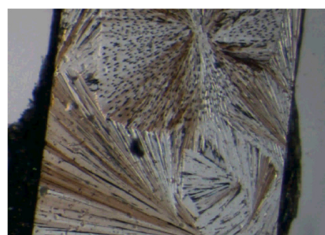

102.5°

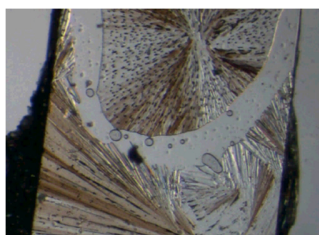

120.8°

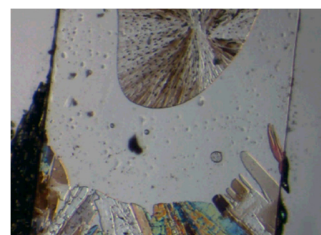

131.1°

### 3-Fluoro

(*S*)-4-Me  
(*R*)-4-F

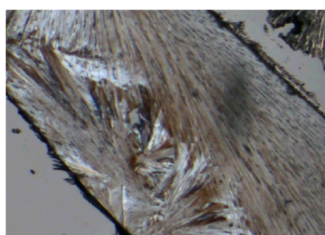

99.6°

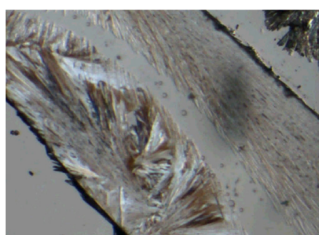

117.5°

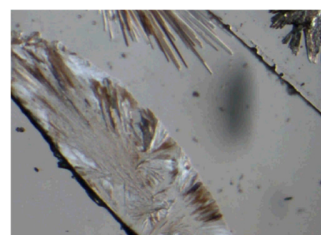

126.7°

(*S*)-4-Cl  
(*R*)-4-F

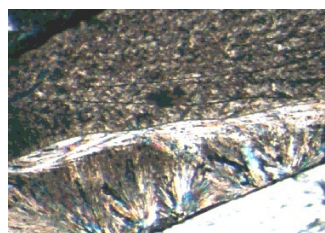

50.8°

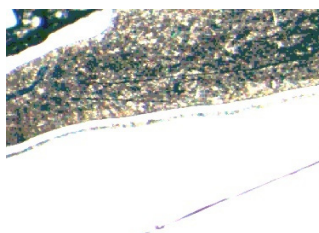

71.5°

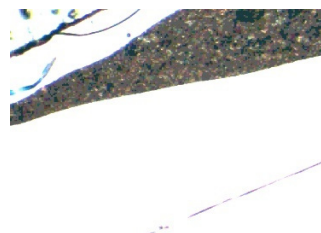

94.4°

(*S*)-4-Br  
(*R*)-4-F

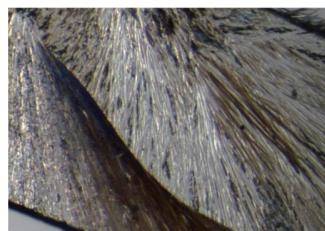

105.5°

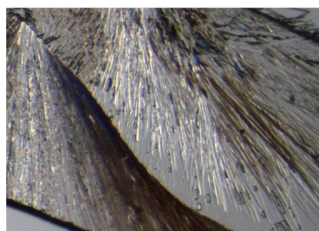

114.7°

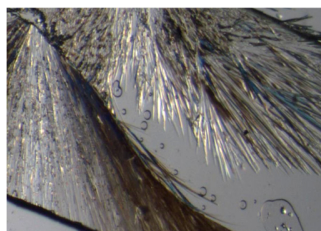

119.4°

(*S*)-4-NO<sub>2</sub>  
(*R*)-4-F

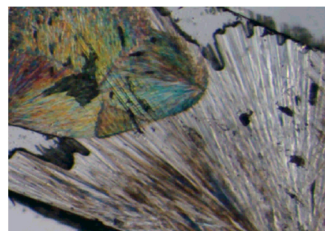

80.2°

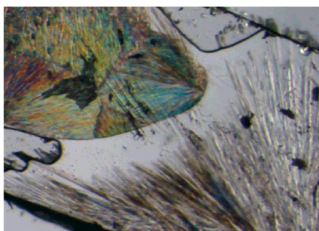

96.4°

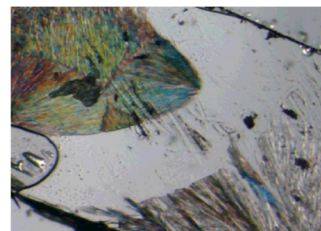

119.8°



(*S*)-4-OMe  
(*R*)-4-F

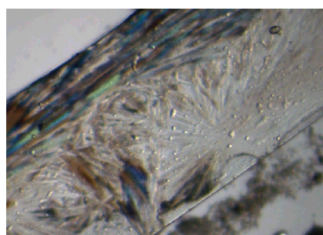

94.2°

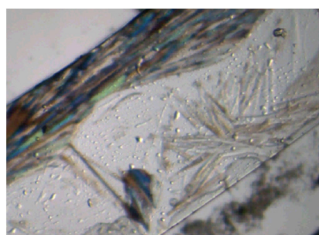

111.8°

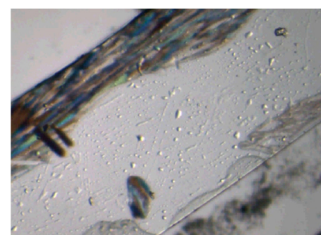

125.7°

(*S*)-4-I  
(*R*)-4-F

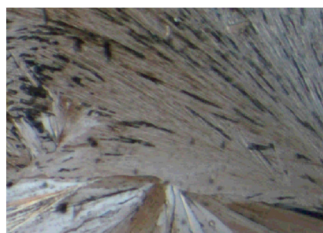

99.5°

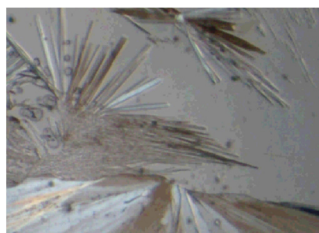

119.5°

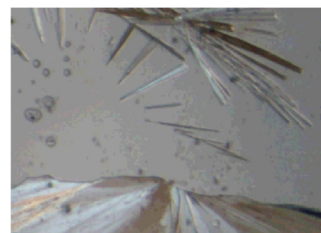

125.9°

(*S*)-4-CF<sub>3</sub>  
(*R*)-4-F

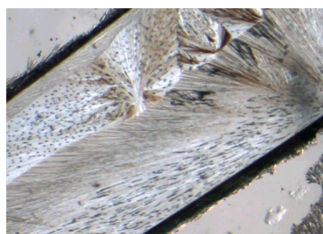

97.3°

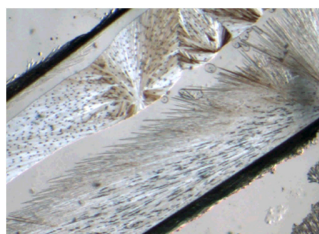

109.1°

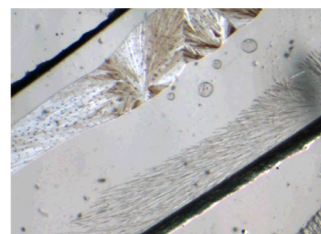

121.2°

#### 4-Methyl

(*S*)-4-Cl  
(*R*)-4-Me

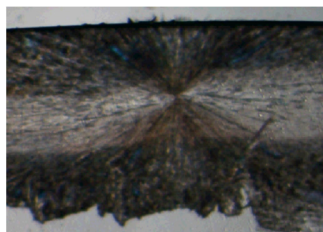

99.8°

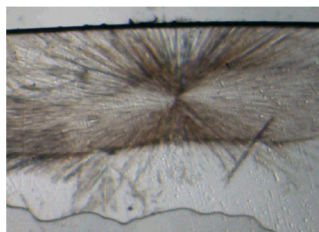

119.1°

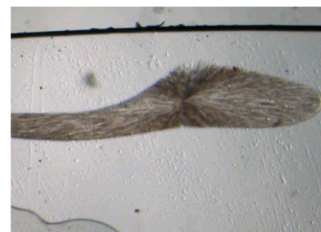

140.7°

(*S*)-4-Br  
(*R*)-4-Me

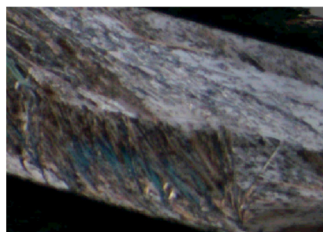

108.9°

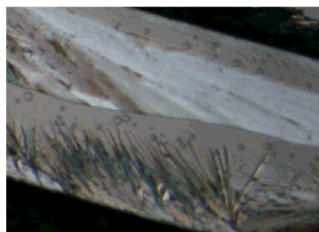

127.0°

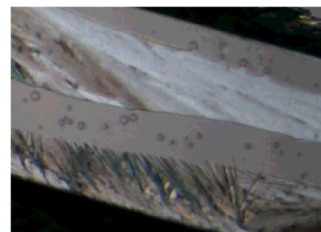

131.2°

(*S*)-4-NO<sub>2</sub>  
(*R*)-4-Me

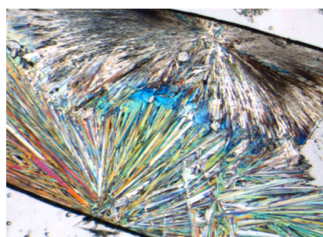

121.4°

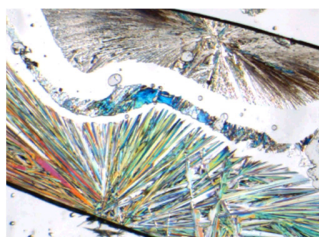

133.7°

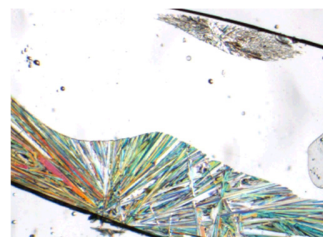

144.7°

(*S*)-4-OMe  
(*R*)-4-Me

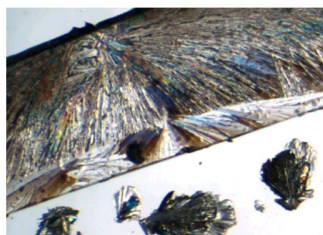

113.7°

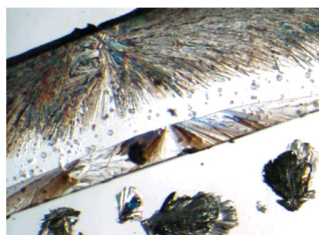

126.5°

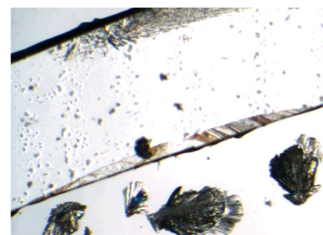

144.9°

(*S*)-4-I  
(*R*)-4-Me

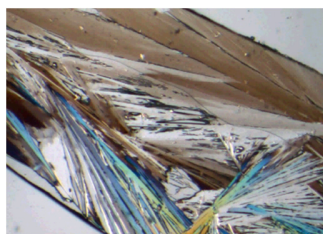

120.0°

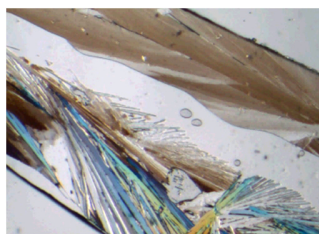

141.5°

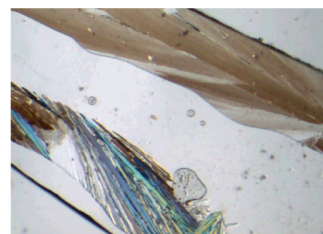

145.3°

(*S*)-4-Me  
(*R*)-4-CF<sub>3</sub>

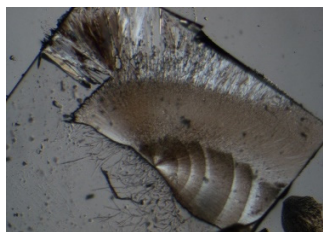

114.0°

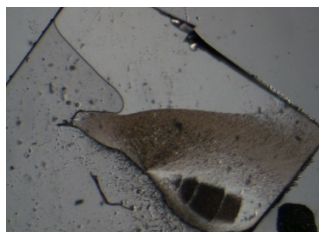

120.3°

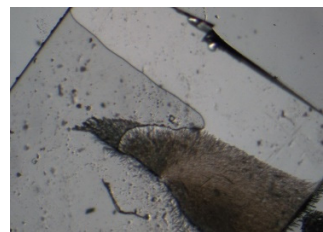

152.9°

#### 4-Chloro

(*S*)-4-Cl  
(*R*)-4-Br

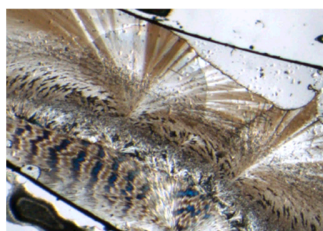

119.8°

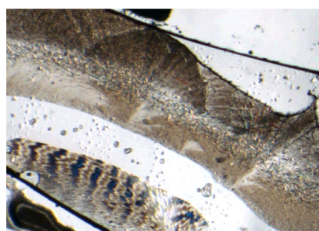

161.7°

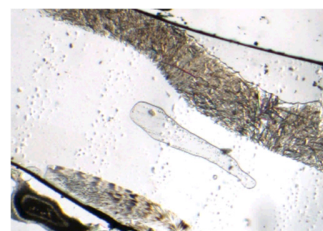

146.1°



(*S*)-4-Cl  
(*R*)-4-NO<sub>2</sub>

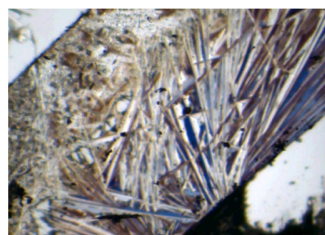

105.7°

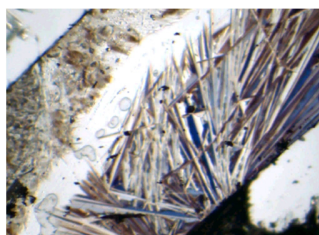

124.0°

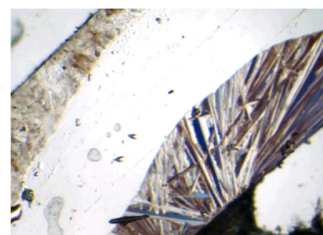

147.1°

(*R*)-4-Cl  
(*S*)-4-OMe

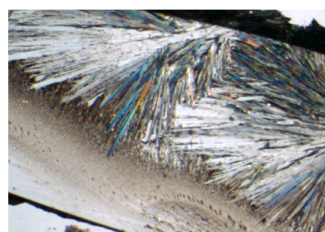

120.3°

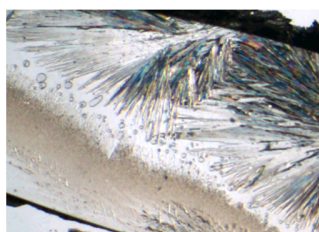

131.9°

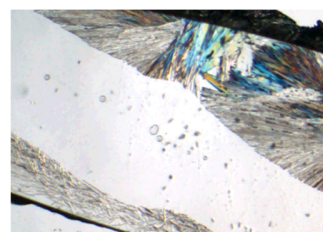

152.2°

(*S*)-4-I  
(*R*)-4-Cl

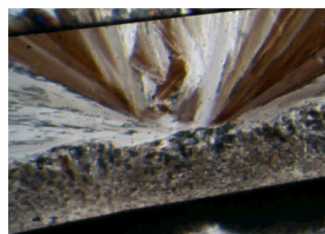

134.2°

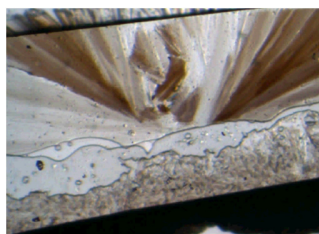

153.3°

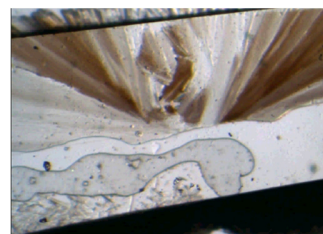

158.0°

(*S*)-4-Cl  
(*R*)-4-CF<sub>3</sub>

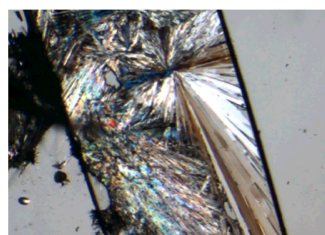

114.9°

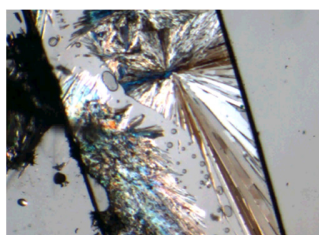

138.0°

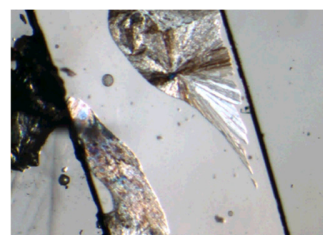

161.4°

#### 4-Bromo

(*R*)-4-NO<sub>2</sub>  
(*S*)-4-Br

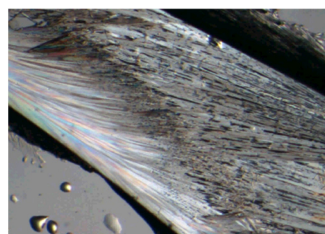

112.8°

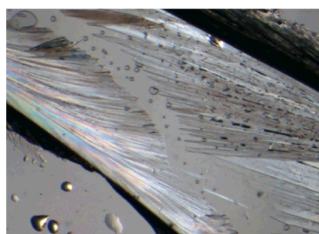

128.6°

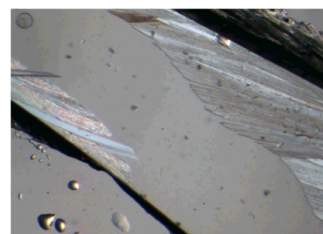

147.0°

(*S*)-4-OMe  
(*R*)-4-Br

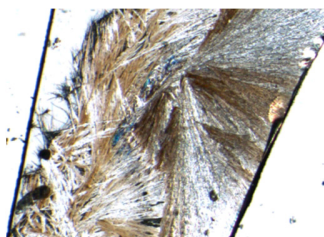

122.6°

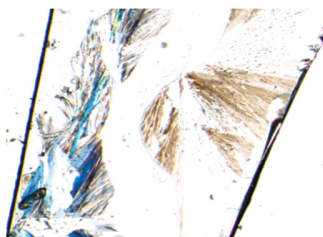

154.7°

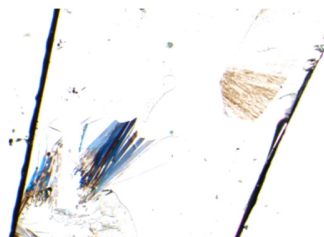

164.4°

(*S*)-4-I  
(*R*)-4-Br

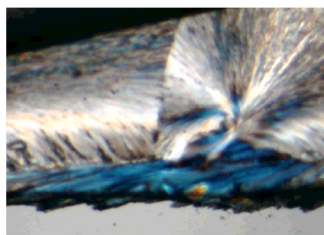

158.0°

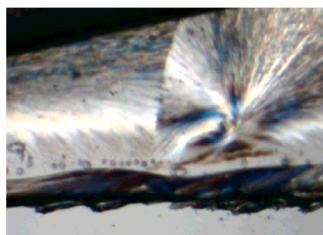

164.6°

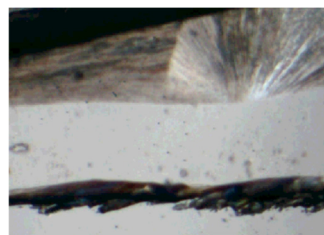

179.3°

(*S*)-4-Br  
(*R*)-4-CF<sub>3</sub>

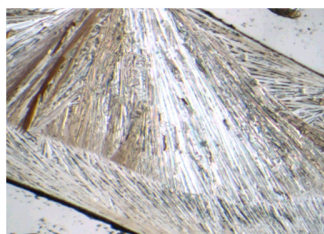

112.1°

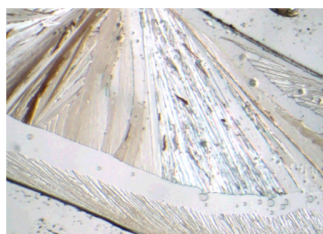

143.9°

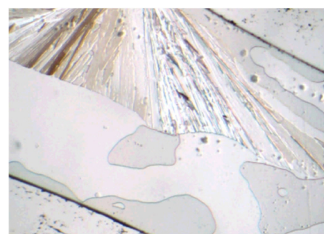

163.8°

#### 4-Nitro

(*R*)-4-NO<sub>2</sub>  
(*S*)-4-OMe

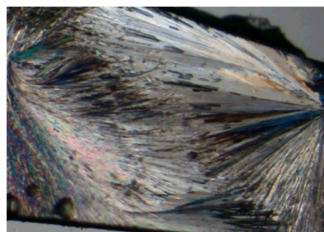

107.6°

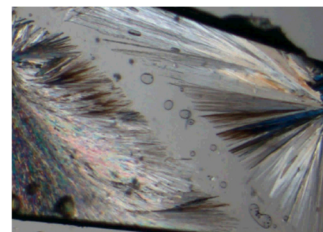

126.0°

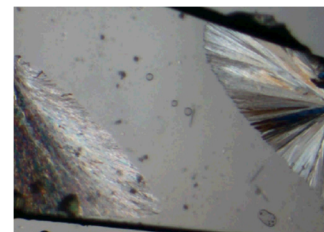

146.4°

(*R*)-4-NO<sub>2</sub>  
(*S*)-4-I

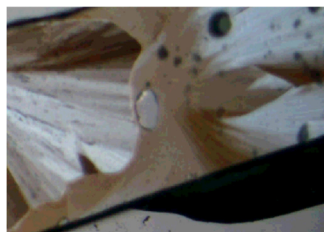

129.5°

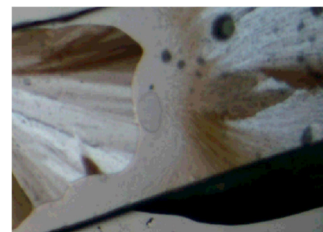

147.5°

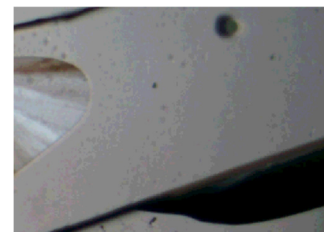

207.4°



(*S*)-4-NO<sub>2</sub>  
(*R*)-4-CF<sub>3</sub>

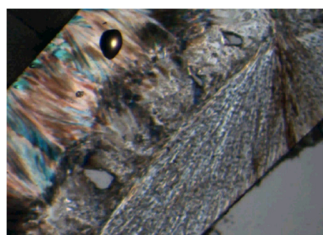

105.0°

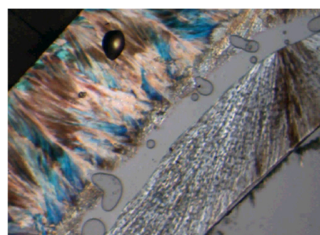

134.5°

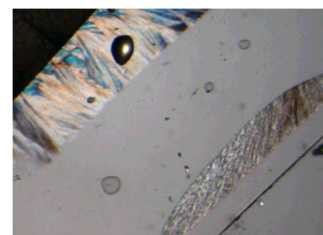

155.1°

#### 4-Methoxy

(*S*)-4-OMe  
(*R*)-4-I

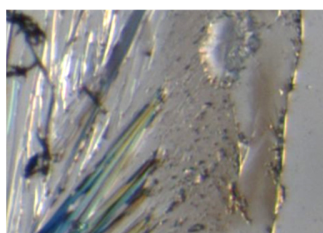

67.8°

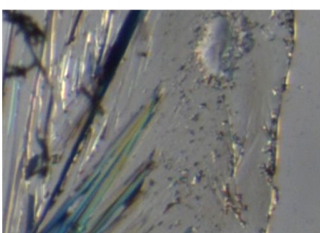

108.9°

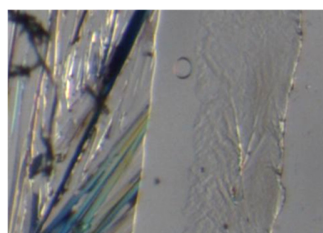

122.8°

(*S*)-4-OMe  
(*R*)-4-CF<sub>3</sub>

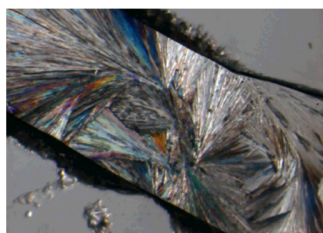

132.9°

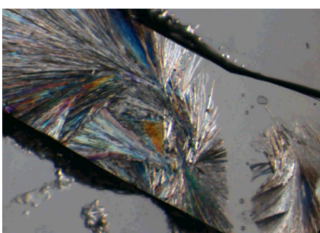

142.0°

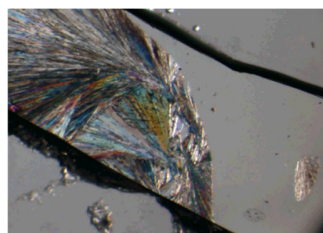

157.0°

#### 4-Iodo

(*S*)-4-I  
(*R*)-4-CF<sub>3</sub>

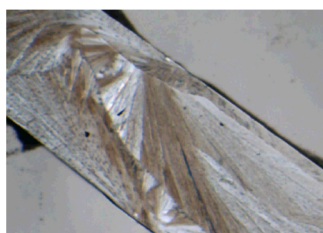

138.6°

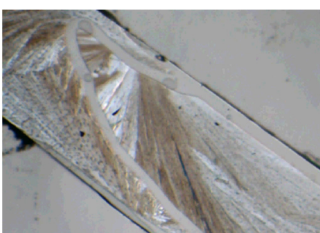

159.6°

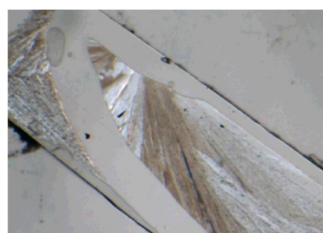

164.4°

### S3. X-ray Crystallography

Table S1. Crystallographic data for diarylamide quasiracemates and racemates.

|                                                                            | <i>rac</i> -H                      | ( <i>R</i> )-H/( <i>S</i> )-3-F                                | <i>Rac</i> -3-F                                           |
|----------------------------------------------------------------------------|------------------------------------|----------------------------------------------------------------|-----------------------------------------------------------|
| Crystal data                                                               |                                    |                                                                |                                                           |
| CCDC deposit no.                                                           | 2111824                            | 2111820                                                        | 2111823                                                   |
| Empirical formula                                                          | C <sub>15</sub> H <sub>15</sub> NO | C <sub>30</sub> H <sub>29</sub> FN <sub>2</sub> O <sub>2</sub> | C <sub>15</sub> H <sub>14</sub> FNO                       |
| Crystal System, space group                                                | Triclinic<br><i>P</i> -1 (no. 2)   | Monoclinic<br><i>P</i> 2 <sub>1</sub> (no. 4)                  | Monoclinic<br><i>P</i> 2 <sub>1</sub> / <i>c</i> (no. 14) |
| <i>M<sub>r</sub></i>                                                       | 225.28                             | 468.55                                                         | 243.27                                                    |
| <i>a</i> , Å                                                               | 5.3257(2)                          | 19.6145(8)                                                     | 23.8795(7)                                                |
| <i>b</i> , Å                                                               | 15.3736(5)                         | 5.2344(2)                                                      | 5.2122(1)                                                 |
| <i>c</i> , Å                                                               | 15.9929(5)                         | 23.5535(10)                                                    | 19.6496(6)                                                |
| $\alpha$ , deg                                                             | 64.793(1)                          | 90                                                             | 90                                                        |
| $\beta$ , deg                                                              | 85.938(1)                          | 90.406(2)                                                      | 90.415(1)                                                 |
| $\gamma$ , deg                                                             | 81.506(1)                          | 90                                                             | 90                                                        |
| <i>V</i> , (Å <sup>3</sup> )                                               | 1171.69(7)                         | 2418.18(17)                                                    | 2445.62(11)                                               |
| <i>Z</i> , <i>Z'</i>                                                       | 4, 2                               | 8, 2                                                           | 8, 2                                                      |
| <i>D<sub>calc</sub></i> (g cm <sup>-3</sup> )                              | 1.277                              | 1.287                                                          | 1.321                                                     |
| $\mu$ (mm <sup>-1</sup> ), rad. type                                       | 0.627, Cu <i>K</i> $\alpha$        | 0.689                                                          | 0.783, Cu <i>K</i> $\alpha$                               |
| <i>F</i> <sub>000</sub>                                                    | 480                                | 992                                                            | 1024                                                      |
| temp (K)                                                                   | 100(2)                             | 100(2)                                                         | 100(2)                                                    |
| Crystal form, color                                                        | block, colorless                   | prism, colorless                                               | needle, colorless                                         |
| Crystal size, mm                                                           | 0.26 x 0.24 x 0.20                 | 0.39 x 0.8 x 0.33                                              | 0.17 x 0.06 x 0.03                                        |
| Data collection                                                            |                                    |                                                                |                                                           |
| Diffractometer                                                             | Bruker Apex II                     | Bruker D8 Venture                                              | Bruker D8 Venture                                         |
| <i>T</i> <sub>min</sub> / <i>T</i> <sub>max</sub>                          | 0.687/0.753                        | 0.661/0.754                                                    | 0.689/0.753                                               |
| No. of refls. (meas.,<br>uniqu., and obs.)                                 | 15649/4230/3807                    | 64624/9421/8391                                                | 23774/4473/3939                                           |
| <i>R</i> <sub>int</sub>                                                    | 0.0381                             | 0.0567                                                         | 0.0440                                                    |
| $\theta$ <sub>max</sub> (°)                                                | 68.23                              | 72.36                                                          | 68.31                                                     |
| Refinement                                                                 |                                    |                                                                |                                                           |
| <i>R</i> / <i>R</i> <sup>2</sup> <sub><math>\omega</math></sub> (obs data) | 0.0466/0.1359                      | 0.0534/0.1372                                                  | 0.0325/0.0770                                             |
| <i>R</i> / <i>R</i> <sup>2</sup> <sub><math>\omega</math></sub> (all data) | 0.0502/0.1383                      | 0.0592/0.1439                                                  | 0.0395/0.0809                                             |
| <i>S</i>                                                                   | 1.170                              | 1.032                                                          | 1.045                                                     |
| No. of refls.                                                              | 4230                               | 9421                                                           | 4473                                                      |
| No. of parameters                                                          | 315                                | 666                                                            | 353                                                       |
| $\Delta\rho$ <sub>max/min</sub> (e·Å <sup>-3</sup> )                       | 0.310/-0.206                       | 0.621/-0.259                                                   | 0.199/-0.201                                              |
| <i>flack</i>                                                               | -                                  | 0.08(8)                                                        | -                                                         |

Table S1. Crystallographic Data for Diarylamide Quasiracemates and Racemates. (Continued)

|                                                                            | <i>rac</i> -3-Cl                     | ( <i>R</i> )-3-Cl/( <i>S</i> )-3-Me                                      | <i>rac</i> -3-Me                               |
|----------------------------------------------------------------------------|--------------------------------------|--------------------------------------------------------------------------|------------------------------------------------|
| Crystal data                                                               |                                      |                                                                          |                                                |
| CCDC deposit no.                                                           | 2111822                              | 2111817                                                                  | 2111826                                        |
| Empirical formula                                                          | C <sub>15</sub> H <sub>14</sub> ClNO | C <sub>31</sub> H <sub>31</sub> ClN <sub>2</sub> O <sub>2</sub>          | C <sub>16</sub> H <sub>17</sub> NO             |
| Crystal System, space group                                                | Orthorhombic<br><i>Pbca</i> (no. 61) | Orthorhombic<br><i>P2<sub>1</sub>2<sub>1</sub>2<sub>1</sub></i> (no. 19) | Tetragonal<br><i>P4<sub>2</sub>/n</i> (no. 86) |
| <i>M<sub>r</sub></i>                                                       | 259.72                               | 499.03                                                                   | 239.30                                         |
| <i>a</i> , Å                                                               | 10.2810(3)                           | 9.9288(3)                                                                | 224232(5)                                      |
| <i>b</i> , Å                                                               | 9.9520(3)                            | 10.2423(3)                                                               | 22.4232(5)                                     |
| <i>c</i> , Å                                                               | 25.9574(8)                           | 26.1270(7)                                                               | 5.1912(2)                                      |
| $\alpha$ , deg                                                             | 90                                   | 90                                                                       | 90                                             |
| $\beta$ , deg                                                              | 90                                   | 90                                                                       | 90                                             |
| $\gamma$ , deg                                                             | 90                                   | 90                                                                       | 90                                             |
| <i>V</i> , (Å <sup>3</sup> )                                               | 2655.874(14)                         | 2656.95(13)                                                              | 2610(15)                                       |
| <i>Z</i> , <i>Z'</i>                                                       | 8, 1                                 | 4, 1                                                                     | 8, 1                                           |
| <i>D<sub>calc</sub></i> (g cm <sup>-3</sup> )                              | 1.299                                | 1.248                                                                    | 1.218                                          |
| $\mu$ (mm <sup>-1</sup> ), rad. type                                       | 2.432, Cu <i>K</i> $\alpha$          | 1.506, Cu <i>K</i> $\alpha$                                              | 0.590, Cu <i>K</i> $\alpha$                    |
| <i>F</i> <sub>000</sub>                                                    | 1088                                 | 1056                                                                     | 1024                                           |
| temp (K)                                                                   | 100(2)                               | 100(2)                                                                   | 100(2)                                         |
| Crystal form, color                                                        | block, colorless                     | needle, colorless                                                        | needle, colorless                              |
| Crystal size, mm                                                           | 0.26 x 0.18 x 0.11                   | 0.21 x 0.04 x 0.02                                                       | 0.22 x 0.06 x 0.02                             |
| Data collection                                                            |                                      |                                                                          |                                                |
| Diffractometer                                                             | Bruker Apex II                       | Bruker D8 Venture                                                        | Bruker D8 Venture                              |
| <i>T</i> <sub>min</sub> / <i>T</i> <sub>max</sub>                          | 0.635/0.753                          | 0.681/0.753                                                              | 0.693/0.754                                    |
| No. of refls. (meas.,<br>uniqu., and obs.)                                 | 11017/2429/2227                      | 81064/4867/4562                                                          | 16133/2675/2318                                |
| <i>R</i> <sub>int</sub>                                                    | 0.0350                               | 0.0616                                                                   | 0.0426                                         |
| $\theta$ <sub>max</sub> (°)                                                | 68.25                                | 68.23                                                                    | 74.40                                          |
| Refinement                                                                 |                                      |                                                                          |                                                |
| <i>R</i> / <i>R</i> <sup>2</sup> <sub><math>\omega</math></sub> (obs data) | 0.0339/0.0860                        | 0.0364/0.0921                                                            | 0.0418/0.1083                                  |
| <i>R</i> / <i>R</i> <sup>2</sup> <sub><math>\omega</math></sub> (all data) | 0.0366/0.0880                        | 0.0397/0.0948                                                            | 0.0496/0.1143                                  |
| <i>S</i>                                                                   | 1.062                                | 1.026                                                                    | 1.050                                          |
| No. of refls.                                                              | 2429                                 | 4867                                                                     | 2675                                           |
| No. of parameters                                                          | 213                                  | 484                                                                      | 168                                            |
| $\Delta\rho$ <sub>max/min</sub> (e·Å <sup>-3</sup> )                       | 0.302/-0.220                         | 0.482/-0.247                                                             | 0.499/-0.221                                   |
| <i>flack</i>                                                               | -                                    | 0.062(4)                                                                 | -                                              |

Table S1. Crystallographic Data for Diarylamide Quasiracemates and Racemates. (Continued)

|                                                                            | <i>rac</i> -3-Br                                          | ( <i>R</i> )-3-Br/( <i>S</i> )-3-CF <sub>3</sub>                               | <i>rac</i> -3-CF <sub>3</sub>                             |
|----------------------------------------------------------------------------|-----------------------------------------------------------|--------------------------------------------------------------------------------|-----------------------------------------------------------|
| Crystal data                                                               |                                                           |                                                                                |                                                           |
| CCDC deposit no.                                                           | 2111821                                                   | 2111816                                                                        | 2111825                                                   |
| Empirical formula                                                          | C <sub>15</sub> H <sub>14</sub> BrNO                      | C <sub>31</sub> H <sub>28</sub> BrF <sub>3</sub> N <sub>2</sub> O <sub>2</sub> | C <sub>16</sub> H <sub>14</sub> F <sub>3</sub> NO         |
| Crystal System, space group                                                | Monoclinic<br><i>P</i> 2 <sub>1</sub> / <i>c</i> (no. 14) | Monoclinic<br><i>P</i> 2 <sub>1</sub> (no. 4)                                  | Monoclinic<br><i>P</i> 2 <sub>1</sub> / <i>c</i> (no. 14) |
| <i>M<sub>r</sub></i>                                                       | 304.18                                                    | 597.46                                                                         | 293.28                                                    |
| <i>a</i> , Å                                                               | 12.0922(8)                                                | 9.3990(8)                                                                      | 24.6609(11)                                               |
| <i>b</i> , Å                                                               | 5.0801(3)                                                 | 5.8355(5)                                                                      | 5.8339(3)                                                 |
| <i>c</i> , Å                                                               | 21.6705(14)                                               | 24.4782(14)                                                                    | 9.4777(4)                                                 |
| $\alpha$ , deg                                                             | 90                                                        | 90                                                                             | 90                                                        |
| $\beta$ , deg                                                              | 98.83693)                                                 | 93.306(6)                                                                      | 93.863(2)                                                 |
| $\gamma$ , deg                                                             | 90                                                        | 90                                                                             | 90                                                        |
| <i>V</i> , (Å <sup>3</sup> )                                               | 1315.41(14)                                               | 1340.34(14)                                                                    | 1360.45(11)                                               |
| <i>Z</i> , <i>Z'</i>                                                       | 4, 1                                                      | 2, 1                                                                           | 4, 1                                                      |
| <i>D<sub>calc</sub></i> (g cm <sup>-3</sup> )                              | 1.536                                                     | 1.480                                                                          | 1.432                                                     |
| $\mu$ (mm <sup>-1</sup> ), rad. type                                       | 4.146, Cu <i>K</i> $\alpha$                               | 2.545, Cu <i>K</i> $\alpha$                                                    | 1.005, Cu <i>K</i> $\alpha$                               |
| <i>F</i> <sub>000</sub>                                                    | 616                                                       | 612                                                                            | 608                                                       |
| temp (K)                                                                   | 100(2)                                                    | 100(2)                                                                         | 100(2)                                                    |
| Crystal form, color                                                        | needle, colorless                                         | block, colorless                                                               | block, colorless                                          |
| Crystal size, mm                                                           | 0.26 x 0.06 x 0.05                                        | 0.25 x 0.25 x 0.09                                                             | 0.25 x 0.16 x 0.10                                        |
| Data collection                                                            |                                                           |                                                                                |                                                           |
| Diffractometer                                                             | Bruker D8 Venture                                         | Bruker Apex II                                                                 | Bruker Apex II                                            |
| <i>T</i> <sub>min</sub> / <i>T</i> <sub>max</sub>                          | 0.566/0.753                                               | 0.623/0.753                                                                    | 0.640/0.753                                               |
| No. of refls. (meas.,<br>uniqu., and obs.)                                 | 17437/2395/2224                                           | 18045/4872/4714                                                                | 34741/2439/2310                                           |
| <i>R</i> <sub>int</sub>                                                    | 0.0587                                                    | 0.0327                                                                         | 0.0353                                                    |
| $\theta_{\max}$ (°)                                                        | 68.22                                                     | 69.018                                                                         | 68.46                                                     |
| Refinement                                                                 |                                                           |                                                                                |                                                           |
| <i>R</i> / <i>R</i> <sup>2</sup> <sub><math>\omega</math></sub> (obs data) | 0.0248/0.0593                                             | 0.0258/0.0658                                                                  | 0.0365/0.0862                                             |
| <i>R</i> / <i>R</i> <sup>2</sup> <sub><math>\omega</math></sub> (all data) | 0.0280/0.0613                                             | 0.0271/0.0671                                                                  | 0.0381/0.0870                                             |
| <i>S</i>                                                                   | 1.064                                                     | 1.047                                                                          | 1.171                                                     |
| No. of refls.                                                              | 2395                                                      | 4872                                                                           | 2439                                                      |
| No. of parameters                                                          | 167                                                       | 354                                                                            | 191                                                       |
| $\Delta\rho_{\max/\min}$ (e·Å <sup>-3</sup> )                              | 0.450/-0.292                                              | 0.258/-0.249                                                                   | 0.240/-0.217                                              |
| <i>flack</i>                                                               | -                                                         | 0.041(6)                                                                       | -                                                         |



Table S1. Crystallographic Data for Diarylamide Quasiracemates and Racemates. (Continued)

|                                                                            | <i>rac</i> -H                      | ( <i>R</i> )-H/( <i>S</i> )-4-F                                | <i>rac</i> -4-F                                  |
|----------------------------------------------------------------------------|------------------------------------|----------------------------------------------------------------|--------------------------------------------------|
| Crystal data                                                               |                                    |                                                                |                                                  |
| CCDC deposit no.                                                           | 2111824                            | 2111819                                                        | 2111828                                          |
| Empirical formula                                                          | C <sub>15</sub> H <sub>15</sub> NO | C <sub>30</sub> H <sub>29</sub> FN <sub>2</sub> O <sub>2</sub> | C <sub>15</sub> H <sub>14</sub> FNO <sub>2</sub> |
| Crystal System, space group                                                | Triclinic                          | Monoclinic                                                     | Monoclinic                                       |
|                                                                            | <i>P</i> -1 (no. 2)                | <i>P</i> 2 <sub>1</sub> (no. 4)                                | <i>P</i> 2 <sub>1</sub> / <i>c</i> (no. 14)      |
| <i>M<sub>r</sub></i>                                                       | 225.28                             | 468.55                                                         | 243.27                                           |
| <i>a</i> , Å                                                               | 5.3257(2)                          | 9.6630(4)                                                      | 11.4913(4)                                       |
| <i>b</i> , Å                                                               | 15.3736(5)                         | 11.6828(6)                                                     | 11.7383(5)                                       |
| <i>c</i> , Å                                                               | 15.9929(5)                         | 11.4711(5)                                                     | 9.6372(4)                                        |
| $\alpha$ , deg                                                             | 64.793(1)                          | 90                                                             | 90                                               |
| $\beta$ , deg                                                              | 85.938(1)                          | 106.186(2)                                                     | 106.175(3)                                       |
| $\gamma$ , deg                                                             | 81.506(1)                          | 90                                                             | 90                                               |
| <i>V</i> , (Å <sup>3</sup> )                                               | 1171.69(7)                         | 1243.65(10)                                                    | 1248.49(9)                                       |
| <i>Z</i> , <i>Z'</i>                                                       | 4, 2                               | 2, 1                                                           | 4, 1                                             |
| <i>D<sub>calc</sub></i> (g cm <sup>-3</sup> )                              | 1.277                              | 1.251                                                          | 1.294                                            |
| $\mu$ (mm <sup>-1</sup> ), rad. type                                       | 0.627, Cu <i>K</i> $\alpha$        | 0.670, Cu <i>K</i> $\alpha$                                    | 0.747, Cu <i>K</i> $\alpha$                      |
| <i>F</i> <sub>000</sub>                                                    | 480                                | 496                                                            | 512                                              |
| temp (K)                                                                   | 100(2)                             | 100(2)                                                         | 100(2)                                           |
| Crystal form, color                                                        | block, colorless                   | needle, colorless                                              | blade, colorless                                 |
| Crystal size, mm                                                           | 0.26 x 0.24 x 0.20                 | 0.23 x 0.12 x 0.04                                             | 0.27 x 0.07 x 0.04                               |
| Data collection                                                            |                                    |                                                                |                                                  |
| Diffractometer                                                             | Bruker Apex II                     | Bruker Apex II                                                 | Bruker Apex II                                   |
| <i>T</i> <sub>min</sub> / <i>T</i> <sub>max</sub>                          | 0.687/0.753                        | 0.670/0.753                                                    | 0.677/0.753                                      |
| No. of refls. (meas.,<br>uniqu., and obs.)                                 | 15649/4230/3807                    | 19000/4178/3090                                                | 9413/2269/1680                                   |
| <i>R</i> <sub>int</sub>                                                    | 0.0381                             | 0.0679                                                         | 0.0515                                           |
| $\theta_{\max}$ (°)                                                        | 68.23                              | 68.22                                                          | 68.24                                            |
| Refinement                                                                 |                                    |                                                                |                                                  |
| <i>R</i> / <i>R</i> <sup>2</sup> <sub><math>\omega</math></sub> (obs data) | 0.0466/0.1359                      | 0.0514/0.1258                                                  | 0.0509/0.1207                                    |
| <i>R</i> / <i>R</i> <sup>2</sup> <sub><math>\omega</math></sub> (all data) | 0.0502/0.1383                      | 0.0751/0.1395                                                  | 0.0719/0.1321                                    |
| <i>S</i>                                                                   | 1.170                              | 1.026                                                          | 1.036                                            |
| No. of refls.                                                              | 4230                               | 4178                                                           | 2269                                             |
| No. of parameters                                                          | 315                                | 324                                                            | 167                                              |
| $\Delta\rho_{\max/\min}$ (e·Å <sup>-3</sup> )                              | 0.310/-0.206                       | 0.220/-0.226                                                   | 0.191/-0.333                                     |
| <i>flack</i>                                                               | -                                  | 0.1(2)                                                         | -                                                |

Table S1. Crystallographic Data for Diarylamide Quasiracemates and Racemates. (Continued)

|                                                                            | <i>rac</i> -4-Me <sup>1</sup>                      | ( <i>R</i> )-4-Me/( <i>S</i> )-4-NO <sub>2</sub> <sup>1</sup> | <i>rac</i> -4-NO <sub>2</sub> <sup>1</sup>                    |
|----------------------------------------------------------------------------|----------------------------------------------------|---------------------------------------------------------------|---------------------------------------------------------------|
| Crystal data                                                               |                                                    |                                                               |                                                               |
| CCDC deposit no.                                                           | ISACEK                                             | ISACUA                                                        | ISACOU                                                        |
| Empirical formula                                                          | C <sub>16</sub> H <sub>17</sub> NO                 | C <sub>31</sub> H <sub>31</sub> N <sub>3</sub> O <sub>4</sub> | C <sub>15</sub> H <sub>14</sub> N <sub>2</sub> O <sub>3</sub> |
| Crystal System, space group                                                | Orthorhombic<br><i>Pca</i> 2 <sub>1</sub> (no. 29) | Monoclinic<br><i>P</i> 2 <sub>1</sub> (no. 4)                 | Monoclinic<br><i>P</i> 2 <sub>1</sub> / <i>n</i> (no. 14)     |
| <i>M<sub>r</sub></i>                                                       | 478.64                                             | 574.46                                                        | 270.29                                                        |
| <i>a</i> , Å                                                               | 12.332(1)                                          | 9.4413(9)                                                     | 11.8850(1)                                                    |
| <i>b</i> , Å                                                               | 9.731(1)                                           | 5.9721(7)                                                     | 5.4550(1)                                                     |
| <i>c</i> , Å                                                               | 22.926(1)                                          | 23.294(3)                                                     | 40.4438(6)                                                    |
| $\alpha$ , deg                                                             | 90                                                 | 90                                                            | 90                                                            |
| $\beta$ , deg                                                              | 90                                                 | 93.670(9)                                                     | 95.367(1)                                                     |
| $\gamma$ , deg                                                             | 90                                                 | 90                                                            | 90                                                            |
| <i>V</i> , (Å <sup>3</sup> )                                               | 2751.18                                            | 1316.35                                                       | 2610.58                                                       |
| <i>Z</i> , <i>Z'</i>                                                       | 8, 1                                               | 2, 1                                                          | 8, 2                                                          |
| <i>D<sub>calc</sub></i> (g cm <sup>-3</sup> )                              | 1.155                                              | 1.286                                                         | 1.375                                                         |
| $\mu$ (mm <sup>-1</sup> ), rad. type                                       |                                                    |                                                               |                                                               |
| <i>F</i> <sub>000</sub>                                                    |                                                    |                                                               |                                                               |
| temp (K)                                                                   |                                                    |                                                               |                                                               |
| Crystal form, color                                                        |                                                    |                                                               |                                                               |
| Crystal size, mm                                                           |                                                    |                                                               |                                                               |
| Data collection                                                            |                                                    |                                                               |                                                               |
| Diffractionmeter                                                           |                                                    |                                                               |                                                               |
| <i>T<sub>min</sub></i> / <i>T<sub>max</sub></i>                            |                                                    |                                                               |                                                               |
| No. of refls. (meas.,<br>uniqu., and obs.)                                 |                                                    |                                                               |                                                               |
| <i>R<sub>int</sub></i>                                                     |                                                    |                                                               |                                                               |
| $\theta_{\max}$ (°)                                                        |                                                    |                                                               |                                                               |
| Refinement                                                                 |                                                    |                                                               |                                                               |
| <i>R</i> / <i>R</i> <sup>2</sup> <sub><math>\omega</math></sub> (obs data) |                                                    |                                                               |                                                               |
| <i>R</i> / <i>R</i> <sup>2</sup> <sub><math>\omega</math></sub> (all data) |                                                    |                                                               |                                                               |
| <i>S</i>                                                                   |                                                    |                                                               |                                                               |
| No. of refls.                                                              |                                                    |                                                               |                                                               |
| No. of parameters                                                          |                                                    |                                                               |                                                               |
| $\Delta\rho_{\max/\min}$ (e·Å <sup>-3</sup> )                              |                                                    |                                                               |                                                               |
| <i>flack</i>                                                               |                                                    |                                                               |                                                               |

<sup>1</sup>. Hendi, M.S.; Hooter, P.; Davis, R.E.; Lynch, V.M.; Wheeler, K.A. Cryst.Growth Des. **2004**, *4*, 95-101.

Table S1. Crystallographic Data for Diarylamide Quasiracemates and Racemates. (Continued)

|                                                                            | <i>rac</i> -4-Br                                          | ( <i>R</i> )-4-Br/( <i>S</i> )-4-OCH <sub>3</sub>               | <i>rac</i> -4-OCH <sub>3</sub>                  |
|----------------------------------------------------------------------------|-----------------------------------------------------------|-----------------------------------------------------------------|-------------------------------------------------|
| Crystal data                                                               |                                                           |                                                                 |                                                 |
| CCDC deposit no.                                                           | 2111827                                                   | 2111818                                                         | 2111829                                         |
| Empirical formula                                                          | C <sub>15</sub> H <sub>14</sub> BrNO                      | C <sub>31</sub> H <sub>31</sub> BrN <sub>2</sub> O <sub>3</sub> | C <sub>16</sub> H <sub>17</sub> NO <sub>2</sub> |
| Crystal System, space group                                                | Monoclinic<br><i>P</i> 2 <sub>1</sub> / <i>c</i> (no. 14) | Monoclinic<br><i>C</i> 2 (no. 5)                                | Monoclinic<br><i>C</i> 2/ <i>c</i> (no. 15)     |
| <i>M<sub>r</sub></i>                                                       | 304.18                                                    | 559.49                                                          | 255.30                                          |
| <i>a</i> , Å                                                               | 11.7790(3)                                                | 20.4363(12)                                                     | 20.524(3)                                       |
| <i>b</i> , Å                                                               | 11.9146(3)                                                | 5.2417(3)                                                       | 5.2239(5)                                       |
| <i>c</i> , Å                                                               | 9.7984(2)                                                 | 24.4632(14)                                                     | 24.426(3)                                       |
| $\alpha$ , deg                                                             | 90                                                        | 90                                                              | 90                                              |
| $\beta$ , deg                                                              | 102.518(2)                                                | 94.410(3)                                                       | 93.260(8)                                       |
| $\gamma$ , deg                                                             | 90                                                        | 90                                                              | 90                                              |
| <i>V</i> , (Å <sup>3</sup> )                                               | 1342.44(6)                                                | 2612.8(3)                                                       | 2614.7(5)                                       |
| <i>Z</i> , <i>Z'</i>                                                       | 4, 1                                                      | 4, 1                                                            | 8, 1                                            |
| <i>D<sub>calc</sub></i> (g cm <sup>-3</sup> )                              | 1.505                                                     | 1.422                                                           | 1.297                                           |
| $\mu$ (mm <sup>-1</sup> ), rad. type                                       | 4.063, Cu <i>K</i> $\alpha$                               | 2.429, Cu <i>K</i> $\alpha$                                     | 0.682, Cu <i>K</i> $\alpha$                     |
| <i>F</i> <sub>000</sub>                                                    | 616                                                       | 1160                                                            | 1088                                            |
| temp (K)                                                                   | 100(2)                                                    | 100(2)                                                          | 100(2)                                          |
| Crystal form, color                                                        | needle, colorless                                         | needle, colorless                                               | needle, colorless                               |
| Crystal size, mm                                                           | 0.25 x 0.07 x 0.04                                        | 0.34 x 0.07 x 0.06                                              | 0.19 x 0.04 x 0.02                              |
| Data collection                                                            |                                                           |                                                                 |                                                 |
| Diffractometer                                                             | Bruker Apex II                                            | Bruker Apex II                                                  | Bruker Apex II                                  |
| <i>T</i> <sub>min</sub> / <i>T</i> <sub>max</sub>                          | 0.677/0.753                                               | 0.526/0.753                                                     | 0.678/0.753                                     |
| No. of refls. (meas., uniq., and obs.)                                     | 9079/2432/2194                                            | 20609/4825/3810                                                 | 13710/2357/1909                                 |
| <i>R</i> <sub>int</sub>                                                    | 0.0285                                                    | 0.0551                                                          | 0.0608                                          |
| $\theta$ <sub>max</sub> (°)                                                | 68.25                                                     | 68.30                                                           | 68.24                                           |
| Refinement                                                                 |                                                           |                                                                 |                                                 |
| <i>R</i> / <i>R</i> <sup>2</sup> <sub><math>\omega</math></sub> (obs data) | 0.0258/0.0651                                             | 0.0467/0.1173                                                   | 0.0476/0.1216                                   |
| <i>R</i> / <i>R</i> <sup>2</sup> <sub><math>\omega</math></sub> (all data) | 0.0294/0.0668                                             | 0.0486/0.1182                                                   | 0.0596/0.1272                                   |
| <i>S</i>                                                                   | 1.056                                                     | 1.083                                                           | 1.108                                           |
| No. of refls.                                                              | 2432                                                      | 4719                                                            | 2357                                            |
| No. of parameters                                                          | 167                                                       | 343                                                             | 177                                             |
| $\Delta\rho$ <sub>max/min</sub> (e·Å <sup>-3</sup> )                       | 0.352/-0.324                                              | 1.158/-0.496                                                    | 0.235/-0.216                                    |
| <i>flack</i>                                                               | -                                                         | 0.001(12)                                                       | -                                               |

Table S2. Hydrogen Bond Parameters for Diarylamide Crystal Structures.

| Compound                                         | D–H...A                      | D–H (Å)   | H...A (Å) | D...A (Å)  | D–H...A (°) |
|--------------------------------------------------|------------------------------|-----------|-----------|------------|-------------|
| <i>rac</i> -H                                    | N1A–H1A...O1A <sup>i</sup>   | 0.83(2)   | 2.33(2)   | 3.1093(14) | 156.5(18)   |
|                                                  | N1B–H1B...O1B <sup>ii</sup>  | 0.84(2)   | 2.34(2)   | 3.1173(17) | 153.7(18)   |
| ( <i>S</i> )-H/( <i>R</i> )-3-F                  | N1A–H1A...O1A <sup>iii</sup> | 0.88(5)   | 2.21(5)   | 3.050(5)   | 159(4)      |
|                                                  | N1B–H1B...O1B <sup>iii</sup> | 0.86(6)   | 2.21(5)   | 3.031(5)   | 166(4)      |
|                                                  | N1C–H1C...O1C <sup>iv</sup>  | 0.87(5)   | 2.18(5)   | 3.031(4)   | 163(4)      |
|                                                  | N1D–H1D...O1D <sup>iv</sup>  | 0.86(5)   | 2.22(6)   | 3.044(5)   | 160(4)      |
| <i>rac</i> -3-F                                  | N1A–H1A...O1 <sup>iv</sup>   | 0.865(17) | 2.176(17) | 3.0030(14) | 160.0(14)   |
|                                                  | N1B–H1B...O1B <sup>iii</sup> | 0.861(17) | 2.194(17) | 3.0283(14) | 163.3(14)   |
| <i>rac</i> -3-Cl                                 | N1–H1...O1 <sup>iv</sup>     | 0.83(4)   | 2.04(2)   | 2.855(3)   | 170(3)      |
| ( <i>R</i> )-3-Cl/( <i>S</i> )-3-Me              | N1A–H1A...O1B <sup>v</sup>   | 0.89(4)   | 1.95(4)   | 2.838(3)   | 172(3)      |
|                                                  | N1B–H1B...O1A <sup>i</sup>   | 0.83(4)   | 2.04(4)   | 2.855(3)   | 170(3)      |
| <i>rac</i> -3-Me                                 | N1–H1...O1 <sup>vi</sup>     | 0.86(2)   | 2.21(2)   | 3.0467(15) | 161.5(16)   |
| <i>rac</i> -3-Br                                 | N1–H1...O1 <sup>iii</sup>    | 0.83(3)   | 2.13(3)   | 2.923(2)   | 159(2)      |
| ( <i>R</i> )-3-Br/( <i>S</i> )-3-CF <sub>3</sub> | N1A–H1A...O1B <sup>vii</sup> | 0.81(4)   | 2.17(4)   | 2.954(3)   | 162(4)      |
|                                                  | N1B–H1B...O1A <sup>v</sup>   | 0.85(4)   | 2.10(4)   | 2.928(3)   | 163(3)      |
| <i>rac</i> -3-CF <sub>3</sub>                    | N1–H1...O1 <sup>viii</sup>   | 0.85(2)   | 2.13(2)   | 2.9478(17) | 160.0(16)   |
| ( <i>S</i> )-H/( <i>R</i> )-4-F                  | N1A–H1A...O1B <sup>ix</sup>  | 0.86(3)   | 2.13(3)   | 2.948(6)   | 159(5)      |
|                                                  | N1B–H1B...O1A <sup>x</sup>   | 0.85(3)   | 2.12(3)   | 2.954(6)   | 164(5)      |
| <i>rac</i> -4-F                                  | N1–H1...O1 <sup>xi</sup>     | 0.86(3)   | 2.09(3)   | 2.933(2)   | 167(2)      |
| <i>rac</i> -4-Br                                 | N1A–H1A...O1 <sup>xi</sup>   | 0.80(3)   | 2.15(3)   | 2.924(2)   | 165(2)      |
| ( <i>S</i> )-4-Br/( <i>R</i> )-4-OMe             | N1A–H1A...O1A <sup>ix</sup>  | 0.79(8)   | 2.29(9)   | 3.050(8)   | 161(8)      |
|                                                  | N1B–H1B...O1B <sup>iv</sup>  | 0.81(9)   | 2.27(9)   | 3.043(7)   | 162(8)      |
| <i>rac</i> -4-OMe                                | N1A–H1A...O1 <sup>iv</sup>   | 0.87(2)   | 2.19(2)   | 3.025(2)   | 159(2)      |

Symmetry codes: (i)  $x-1, y, z$ ; (ii)  $x+1, y, z$ ; (iii)  $x, y+1, z$ ; (iv)  $x, y-1, z$ ; (v)  $x, y, z$ ; (vi)  $x, y, z+1$ ; (vii)  $x+1, y, z$ ; (viii)  $x, -y+0.5, z-0.5$ ; (ix)  $2-x, y-3/2, 2-z$ ; (x)  $3-x, y+1/2, 1-z$ ; (xi)  $x, -y+1/2, z+1/2$

## S4. Hirschfeld Surface Analyses

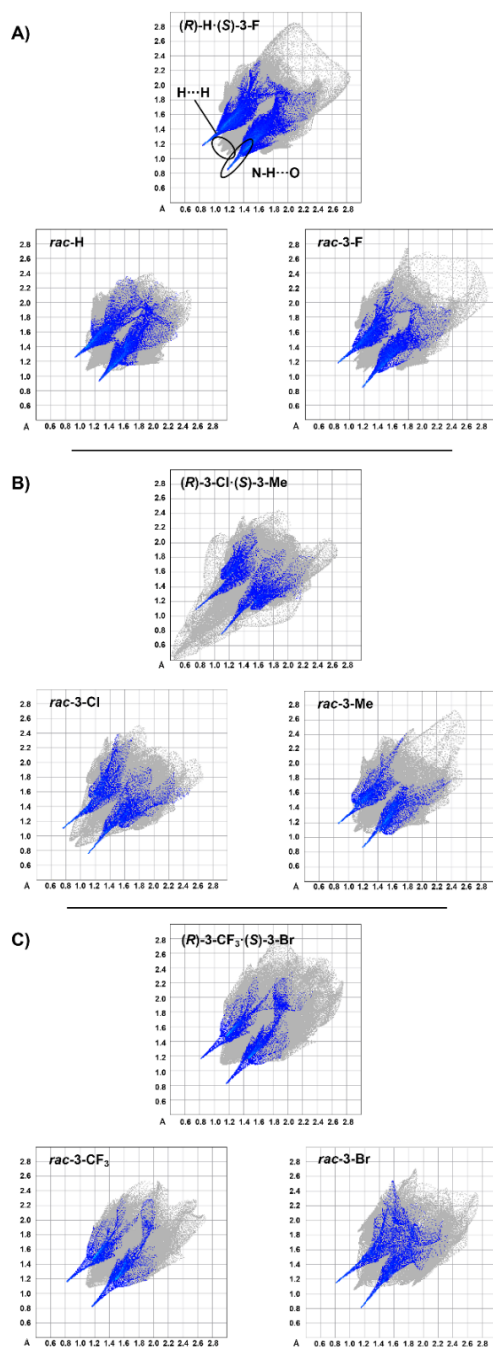

Figure S1. Hirshfeld fingerprint plots for the A) *rac*-3-H, (*R*)-3-H·(*S*)-3-F, *rac*-3-F, B) *rac*-3-Cl, (*R*)-3-Cl·(*S*)-3-Me, *rac*-3-Me, and C) *rac*-3-CF<sub>3</sub>, (*R*)-3-CF<sub>3</sub>·(*S*)-3-Br, *rac*-3-Br 3-substituted diarylamide systems highlighting H···H and O···H contacts. Highlighted blue regions indicate O/H contributions to the surface.

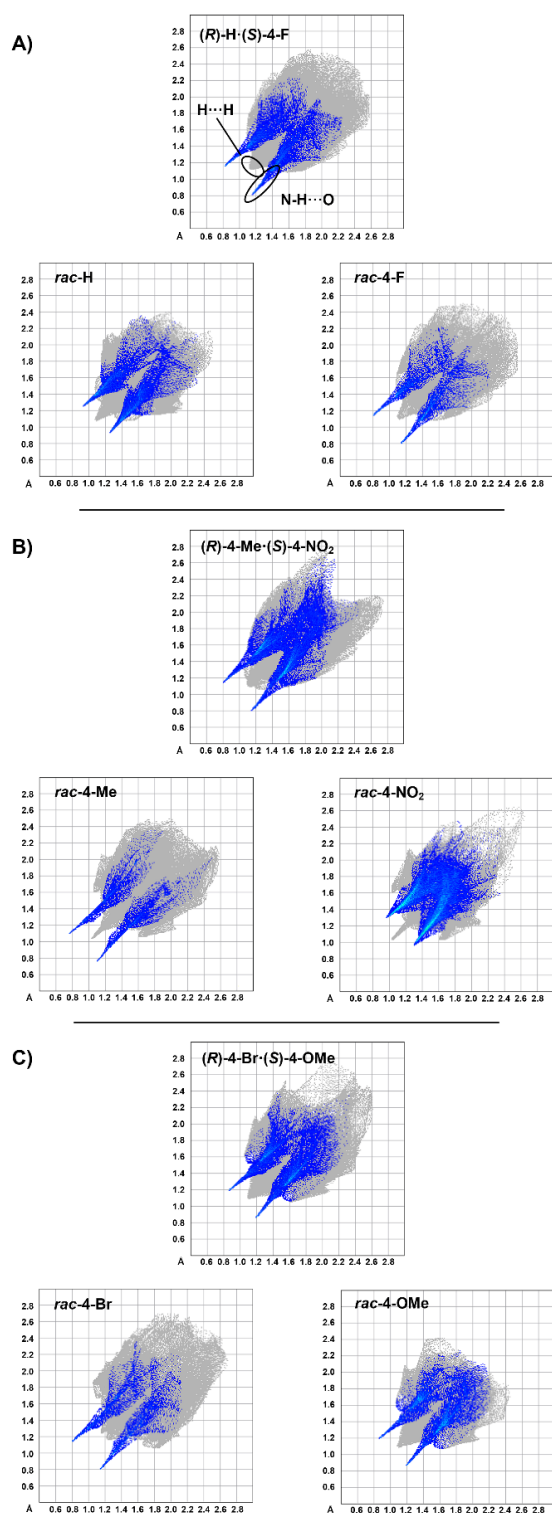

Figure S2. Hirshfeld fingerprint plots for the A) *rac*-4-H, (*R*)-4-H·(*S*)-4-F, *rac*-4-F, B) *rac*-4-Me, (*R*)-4-Me·(*S*)-4-NO<sub>2</sub>, *rac*-4-NO<sub>2</sub>, and C) *rac*-4-Br, (*R*)-4-Br·(*S*)-3-OMe, *rac*-4-OMe 4-substituted diarylamide systems highlighting H···H and O···H contacts. Highlighted blue regions indicate the O/H contributions to the surface.

**S5.** Molecular Volume and Shape Difference Determinations

| Compound Name              | CSD<br>reference<br>codes* | $V_{\text{vdW}}$ ( $\text{\AA}^3$ )<br>(eq 1) | $V_{\text{vdW}}$ ( $\text{\AA}^3$ )<br>VABC | $V_{\text{vdW}}$ ( $\text{\AA}^3$ )<br>TSAR |
|----------------------------|----------------------------|-----------------------------------------------|---------------------------------------------|---------------------------------------------|
| Acetamide                  | ACEMID07                   | 52.18                                         | 60.30                                       | 48.04                                       |
| Acetic acid                | ACETAC09                   | 49.71                                         | 58.09                                       | 46.48                                       |
| n-Butane                   | DUCKOB07                   | 65.94                                         | 77.74                                       | 59.34                                       |
| cis-Butene                 | WUBLUD                     | 62.98                                         | 75.10                                       | 52.56                                       |
| Cyclohexane                | CYCHEX                     | 87.97                                         | 99.98                                       | 77.93                                       |
| Cyclohexanol               | QQQEJV08                   | 94.14                                         | 108.77                                      | 84.87                                       |
| Cyclohexene                | COVJON                     | 83.08                                         | 97.34                                       | 74.27                                       |
| Cyclopentane               | ZZZVYE01                   | 73.86                                         | 82.68                                       | 66.14                                       |
| Methanol                   | METHOL04                   | 31.99                                         | 34.64                                       | 28.91                                       |
| Octanol                    | ZZZVYK01                   | 133.24                                        | 155.72                                      | 118.90                                      |
| Propanoic acid             | PRONAC                     | 66.50                                         | 75.39                                       | 58.81                                       |
| t-Butanol                  | VATSAK02                   | 74.14                                         | 86.53                                       | 66.32                                       |
| trans-Butene               | WUBMAK                     | 62.05                                         | 75.10                                       | 56.53                                       |
| Trimethylamine             | CEKGUU06                   | 62.64                                         | 71.44                                       | 55.69                                       |
| Acetophenone               | ACETPH                     | 110.42                                        | 121.91                                      | 100.08                                      |
| Anthracene                 | ANTCEN23                   | 158.89                                        | 162.48                                      | 120.08                                      |
| Benzene                    | BENZENE26                  | 73.67                                         | 81.17                                       | 58.13                                       |
| Benzophenone               | BPHENO19                   | 161.96                                        | 177.23                                      | 138.62                                      |
| Biphenyl                   | BIPHEN04                   | 143.87                                        | 153.78                                      | 108.33                                      |
| Ethylamine                 | DEBLAYX                    | 47.78                                         | 54.15                                       | 43.55                                       |
| Ethylenediamine            | ETDIAM18                   | 59.41                                         | 65.14                                       | 52.72                                       |
| Formamide                  | FORMAM02                   | 38.39                                         | 43.00                                       | 31.11                                       |
| Piperazine                 | KOXDOTX                    | 80.30                                         | 87.38                                       | 71.53                                       |
| Imidazole                  | IMAZOL14                   | 58.26                                         | 53.91                                       | 45.65                                       |
| Phenol                     | PHENOL03                   | 84.01                                         | 89.96                                       | 76.38                                       |
| Quinoline                  | WADTOMX                    | 113.97                                        | 115.52                                      | 86.84                                       |
| Styrene                    | ZZZTKA02                   | 102.28                                        | 113.12                                      | 77.13                                       |
| Toluene                    | TOLUEN                     | 90.01                                         | 98.46                                       | 82.38                                       |
| 1,2-Dichlorobenzene        | ABUMIT                     | 105.87                                        | 111.59                                      | 90.60                                       |
| 1-Methylnaphthalene        | SAHWOQ                     | 131.75                                        | 139.12                                      | 120.53                                      |
| 1,3,5-Trimethylbenzene     | TUYPEJ                     | 118.03                                        | 133.05                                      | 106.85                                      |
| 1,2,4,5-Tetrafluorobenzene | FACJAU01                   | 99.81                                         | 105.44                                      | 87.17                                       |
| Benzonitrile               | AYELIZ                     | 93.25                                         | 104.19                                      | 73.88                                       |
| Chrysene                   | CRYSEN02                   | 201.00                                        | 203.13                                      | 150.18                                      |
| Cycloheptane               | UNIDUR                     | 97.45                                         | 117.27                                      | 90.71                                       |
| Diisopropylether           | DEWPFI                     | 104.65                                        | 121.12                                      | 94.16                                       |

|                         |          |        |        |        |
|-------------------------|----------|--------|--------|--------|
| m-Dibromobenzene        | SOFVUG02 | 114.20 | 119.73 | 99.27  |
| Methhtbutylether        | CEZSEF   | 89.65  | 103.83 | 79.76  |
| m-Nitrophenol           | MNPHOL20 | 108.08 | 115.90 | 99.94  |
| Nitrobenzene            | NITRBE01 | 99.99  | 107.11 | 79.06  |
| N-Methylmorpholine      | ULOKEL   | 93.04  | 102.47 | 83.53  |
| o-Nitrotoluene          | MOVVOJ   | 114.17 | 124.40 | 105.82 |
| p-Dichlorobenzene       | DCLBEN06 | 106.46 | 111.59 | 90.10  |
| Perylene                | PERLEN08 | 216.14 | 211.83 | 162.13 |
| Thiophene               | DOYBUQ01 | 57.66  | 67.72  | 57.87  |
| 3-Methylindole          | GIYKUU   | 116.94 | 118.16 | 108.49 |
| 1-Naphthol              | NAPHOL   | 130.32 | 130.61 | 114.56 |
| 2-Naphthol              | GIYBIZ   | 126.66 | 130.61 | 114.84 |
| 2-Methylfuran           | ZOGQUK   | 74.77  | 75.30  | 59.54  |
| 3,4-Dinitrophenol       | XIHNOS   | 132.63 | 162.46 | 122.52 |
| 1,3,5-Trihydroxybenzene | PHGLOH03 | 99.93  | 107.54 | 92.21  |
| Anthraquinone           | ANTQUO05 | 176.33 | 188.32 | 132.75 |
| Antipyrine              | ANTPYR   | 163.14 | 169.90 | 148.03 |
| a-Terpineol             | VUYHAA   | 149.05 | 175.31 | 129.57 |
| Barbital                | DETBAA12 | 151.94 | 175.02 | 127.37 |
| Dibenzothiophene        | DBZTHP01 | 140.40 | 149.03 | 120.03 |
| Dimethylformamide       | KOSSOK   | 68.00  | 77.60  | 57.63  |
| Dimethyloxalate         | DMEOXA   | 94.07  | 107.63 | 85.99  |
| Ephedrine               | EPHEDH02 | 152.49 | 170.14 | 128.64 |
| Ethylbenzoate           | WAWFOP   | 131.25 | 148.00 | 120.81 |
| Eucalyptol              | MOFPAY   | 143.06 | 165.59 | 130.19 |
| Formic acid             | FORMAC01 | 36.41  | 40.80  | 30.25  |
| Furfural                | ZOGQEU   | 79.79  | 81.45  | 62.31  |
| Gallic acid             | IJUMEG   | 127.55 | 139.78 | 102.22 |
| Hydroquinone            | HYQUIN06 | 92.26  | 98.75  | 83.25  |
| Valeric acid            | VALRAC   | 87.47  | 109.98 | 85.35  |
| Isoforone               | AFOGUAX  | 131.00 | 155.38 | 117.38 |
| Maleic anhydride        | MLEICA01 | 73.57  | 83.85  | 62.64  |
| Methadone               | METHAD01 | 286.70 | 326.59 | 251.75 |
| Nitrofurazone           | WEVEU02  | 144.84 | 155.04 | 116.54 |
| Octanoic acid           | DIKCUW   | 136.61 | 161.87 | 120.16 |
| o-Phthalic acid         | PHTHAC04 | 130.58 | 145.65 | 105.75 |
| Phenytoin               | PHYDAN03 | 204.74 | 227.61 | 182.95 |
| Resorcinol              | RESORA03 | 92.70  | 98.75  | 84.21  |
| Salicilic acid          | SALIAC16 | 112.93 | 122.20 | 87.35  |
| Succinic acid           | SUCACB16 | 93.01  | 107.63 | 78.01  |
| Thymine                 | THYMIN03 | 98.86  | 114.35 | 79.00  |



|                          |          |        |        |        |
|--------------------------|----------|--------|--------|--------|
| Trifluoromethylbenzene   | OHAQOD   | 107.42 | 116.67 | 104.80 |
| Trimethylamine           | CEKGUU01 | 62.93  | 71.44  | 55.69  |
| Triphenylphosphine oxide | TPEPHO05 | 236.35 | 255.00 | 210.47 |
| Water                    | AFIDIE   | 17.24  | 17.35  | 14.20  |

\*CSD reference codes used to retrieve structural data and determine  $V_{vdW}$  ( $\text{\AA}^3$ ) (Eq 1) values.

The computer code developed to determine molecular volume ( $V_{vdW}$ ) and the shape space differences ( $\%V_{vdW}$ ) of pairs of diarylamides can be found at <https://github.com/dschepens/MDPI-Crystals>.
